# Supplementary material for: Hetero-bimetallic alkali titanosilicates [MOTi{OSi(OtBu)3}3]2 (M = Li–Cs) with terminal Ti–O− groups
Source: Royal Society of Chemistry journal article supplement (doi:10.1039/d2dt00939k), 2022-01-01
Supplement: d2dt00939k1.pdf [file d2dt00939k1.pdf]

## Hetero-bimetallic alkali titanosilicates [MOTi{OSi(O<sup>t</sup>Bu)<sub>3</sub>}]<sub>2</sub> (M = Li–Cs) with terminal Ti–O<sup>−</sup> groups.

Jovana Pérez-Pérez,<sup>a,b</sup> Uvaldo Hernández-Balderas,<sup>a,b</sup> Diego Martínez-Otero,<sup>a,b</sup>  
Mónica Moya-Cabrera<sup>a,b</sup> and Vojtech Jancik<sup>a,b,\*</sup>

<sup>a</sup> Universidad Nacional Autónoma de México, Instituto de Química, Ciudad Universitaria, Ciudad de México, 04510, Mexico.

<sup>b</sup> Centro Conjunto de Investigación en Química Sustentable UAEM-UNAM, Carr. Toluca-Atlacomulco km 14.5, 50200 Toluca, Estado de México, México.

\*vjancik@unam.mx (V. Jancik)

### Materials and characterization methods

The synthesis of compounds (**AS**, **TS**, **1–6**) were performed under a dried dinitrogen atmosphere using Schlenk and glove-box techniques, while the synthesis of silanol **S1** did not require the use of inert atmosphere. Solvents were purchased from Sigma-Aldrich/Merck and dried before use with an MBraun SPS solvent purification system using Grubs' columns. <sup>t</sup>BuOH was dried with metallic sodium and distilled before use. (<sup>t</sup>BuO)<sub>2</sub>Si(OAc)<sub>2</sub> was prepared according to the literature procedure from Si(OAc)<sub>4</sub> and <sup>t</sup>BuOH.<sup>1</sup> C<sub>6</sub>D<sub>6</sub> was and dried with a Na/K alloy and distilled before use. The NMR spectra were recorded on a Bruker Avance 300 spectrometer and <sup>1</sup>H NMR spectra were referenced to residual protons from the deuterated solvent, while <sup>13</sup>C chemical shifts are referenced to C<sub>6</sub>D<sub>6</sub>. <sup>29</sup>Si spectra are referenced to an external standard (TMS). FT-IR spectra were measured on a Bruker Tensor 27 using the ATR technique with a diamond window in the range of 4000–500 cm<sup>−1</sup>. Negative chemical ionization mass spectrometry (NCI-MS) was carried on a Shimadzu GCMS-QP2010 Plus using direct injection in the detection range of *m/z* 20 – 1090. Elemental analyses (C, H, N) were determined on an Elemental vario MICRO Cube analyzer. Melting points were measured on a Büchi B-540 melting point apparatus.

## 1. Synthesis

**Synthesis of (<sup>t</sup>BuO)<sub>3</sub>Si(OAc) (AS) (Route 1):** To a solution of (<sup>t</sup>BuO)<sub>2</sub>Si(OAc)<sub>2</sub> (1.00 g, 3.42 mmol) in toluene (25 mL) was added <sup>t</sup>BuOK (0.383 g, 3.42 mmol). The mixture was stirred and heated at reflux for 2 hours. Afterwards, all volatiles were removed under reduced pressure and a yellow oil was obtained (**AS** and **TS** mixture). The crude product was dissolved in ethyl ether and colourless crystals were obtained after two days, corresponding to cyclotrisiloxanetriol **TS**. It should be noted that, despite our multiple efforts and due to **TS** solubility in **AS**, we were not able to obtain **AS** in a pure form, always was in mixture with **TS**. Nevertheless, compound **TS** could be purified by crystallization from saturated ethyl ether solution.

**[(<sup>t</sup>BuO)<sub>3</sub>Si(μ-O)]<sub>3</sub> (TS)** Yield: 0.586 g, 30%. M.p. 160–161 °C. Elemental Analysis (%) Calcd. for C<sub>24</sub>H<sub>54</sub>O<sub>9</sub>Si<sub>3</sub> (570.94 gmol<sup>-1</sup>): C 50.49, H 9.53; found: C 50.26, H 9.51. FT-IR (ATR) (cm<sup>-1</sup>)  $\tilde{\nu}$  2976, 2934 (w, C–H, CH<sub>3</sub>, CH<sub>2</sub>), 1076 (s, Si–O–C). <sup>1</sup>H NMR (300.53 MHz, CDCl<sub>3</sub>, 25 °C):  $\delta$  (ppm) 1.33 (s, 27H, C(CH<sub>3</sub>)<sub>3</sub>). <sup>13</sup>C{<sup>1</sup>H} NMR (75.57 MHz, CDCl<sub>3</sub>, 25 °C):  $\delta$  (ppm) 73.5 C(CH<sub>3</sub>)<sub>3</sub> 31.5 (C(CH<sub>3</sub>)<sub>3</sub>). <sup>29</sup>Si NMR (59.63 MHz, CDCl<sub>3</sub>, 25 °C):  $\delta$  (ppm) –97.9. EI-MS: *m/z* (%) 455 (36) [M – Me]<sup>+</sup>, 499 (38) [M – C<sub>4</sub>H<sub>8</sub> – Me]<sup>+</sup>, 443 (100) [M – 2C<sub>4</sub>H<sub>8</sub> – Me]<sup>+</sup>, 387 (75) [M – 3C<sub>4</sub>H<sub>8</sub> – Me]<sup>+</sup>, 331 (40) [M – 4C<sub>4</sub>H<sub>8</sub> – Me]<sup>+</sup>, 275 (28) [M – 5C<sub>4</sub>H<sub>8</sub> – Me]<sup>+</sup>.

**Synthesis of (<sup>t</sup>BuO)<sub>3</sub>Si(OAc) (AS) (Route 2):** Anhydrous tert-butanol (145 mL, 1.51 mol) was added to Si(OAc)<sub>4</sub> (40.0 g, 0.151 mol). The reaction mixture was refluxed for 24 h. Afterwards, all volatiles were removed under reduced pressure, and the product was isolated as a colorless oil. Yield: 45.980 g, 99%. Elemental Analysis (%) Calcd. for C<sub>14</sub>H<sub>30</sub>O<sub>5</sub>Si (306.47 gmol<sup>-1</sup>): C 54.87, H 9.87; found: C 54.04, H 9.76. FT-IR (ATR) (cm<sup>-1</sup>)  $\tilde{\nu}$  2976, 2934 (w, C–H, CH<sub>3</sub>, CH<sub>2</sub>), 1742 (m, C=O), 1071 (s, Si–O–C). <sup>1</sup>H NMR (300.53 MHz, CDCl<sub>3</sub>, 25 °C):  $\delta$  (ppm) 2.09 (s, 3H, OCCH<sub>3</sub>), 1.33 (s, 27H, C(CH<sub>3</sub>)<sub>3</sub>). <sup>13</sup>C{<sup>1</sup>H} NMR (75.57 MHz, CDCl<sub>3</sub>, 25 °C):  $\delta$  (ppm) 168.5 (OCCH<sub>3</sub>), 70.4 C(CH<sub>3</sub>)<sub>3</sub> 31.3 (C(CH<sub>3</sub>)<sub>3</sub>), 23.4 (OCCH<sub>3</sub>). <sup>29</sup>Si NMR (59.63 MHz, CDCl<sub>3</sub>, 25 °C):  $\delta$  (ppm) –102.0. EI-MS: *m/z* (%) 291 (50) [M – Me]<sup>+</sup>, 233 (100) [M – O<sup>t</sup>Bu]<sup>+</sup>.

**Synthesis of (<sup>t</sup>BuO)<sub>3</sub>Si(OH) (S1):** Compound **AS** (45.980 g, 0.150 mol) was suspended in an aqueous solution of potassium hydroxide (0.150 L, 10 M). The reaction mixture was vigorously stirred at room temperature for 6 h. Subsequently, the silanol was filtered and washed with cold water. After filtration, the product was isolated as a white powder. Yield: 39.665 g, 99%. M.p. 63–64 °C. Elemental Analysis (%) Calcd. for C<sub>12</sub>H<sub>28</sub>O<sub>4</sub>Si (264.43 gmol<sup>-1</sup>): C 54.50, H 10.67; found: C 53.43, H 10.51. FT-IR (ATR) (cm<sup>-1</sup>)  $\tilde{\nu}$  3528–3086 (w, br, O–H), 2970, 2926 (w, C–H, CH<sub>3</sub>), 991 (s, Si–O). <sup>1</sup>H NMR (300.53 MHz, CDCl<sub>3</sub>, 25 °C):  $\delta$  (ppm) 3.10 (s, 1H, OH), 1.33 (s, 27H, C(CH<sub>3</sub>)<sub>3</sub>). <sup>13</sup>C{<sup>1</sup>H} NMR (75.57 MHz, CDCl<sub>3</sub>, 25 °C):  $\delta$  (ppm) 73.1 C(CH<sub>3</sub>)<sub>3</sub>,

31.5 (C(CH<sub>3</sub>)<sub>3</sub>). <sup>29</sup>Si NMR (59.63 MHz, CDCl<sub>3</sub>, 25 °C): δ (ppm) –90.6. EI-MS: *m/z* (%) 249 (100) [M – Me]<sup>+</sup>, 151 (50) [M – C<sub>4</sub>H<sub>8</sub> – Me]<sup>+</sup>.

**Synthesis of {(<sup>t</sup>BuO)<sub>3</sub>SiO<sub>3</sub>TiNEt<sub>2</sub> (1):** A solution of **S1** (<sup>t</sup>BuO)<sub>3</sub>SiOH (1.00 g, 3.78 mmol) was added dropwise to a stirred cold solution of Ti(NEt<sub>2</sub>)<sub>4</sub> (0.424 g, 1.26 mmol) in toluene at –78 °C. After stirring for 15 min, the solution was allowed to warm to ambient temperature (20 °C) and stirred for 8 h. All volatiles were removed under reduced pressure, and the product was isolated as a yellow powder. Yield: 1.111 g, 97%. M. p. = 148–149 °C. Elemental Analysis (%) Calcd. for C<sub>40</sub>H<sub>91</sub>O<sub>12</sub>NSi<sub>3</sub>Ti (909.532 gmol<sup>-1</sup>): C 52.78, H 10.08; found: C 52.49, H 10.01. FT-IR (ATR) (cm<sup>-1</sup>)  $\tilde{\nu}$  2972, 2930 (w, C–H, CH<sub>3</sub>, CH<sub>2</sub>), 1046 (s, Si–O–C), 952 (s, Si–O–C). <sup>1</sup>H NMR (300.53 MHz, C<sub>6</sub>D<sub>6</sub>, 25 °C): δ (ppm) 4.03 (q, 4H, <sup>3</sup>J<sub>H–H</sub> = 7.0 Hz, N(CH<sub>2</sub>CH<sub>3</sub>)<sub>2</sub>), 1.52 (s, 81H, C(CH<sub>3</sub>)<sub>3</sub>), 1.22 (t, 6H, <sup>3</sup>J<sub>H–H</sub> = 7.0 Hz, N(CH<sub>2</sub>CH<sub>3</sub>)<sub>2</sub>). <sup>13</sup>C{<sup>1</sup>H} NMR (75.57 MHz, C<sub>6</sub>D<sub>6</sub>, 25 °C): δ (ppm) 73.6 (C(CH<sub>3</sub>)<sub>3</sub>), 46.4 (N(CH<sub>2</sub>CH<sub>3</sub>)<sub>2</sub>), 32.1 (C(CH<sub>3</sub>)<sub>3</sub>), 14.9 (N(CH<sub>2</sub>CH<sub>3</sub>)<sub>2</sub>). <sup>29</sup>Si NMR (59.63 MHz, C<sub>6</sub>D<sub>6</sub>): δ (ppm) –101.2.

**General synthetic route for titanosilicates [{(<sup>t</sup>BuO)<sub>3</sub>SiO<sub>3</sub>TiOM]<sub>2</sub> (M= Li, Na, K, Rb, Cs)**

The corresponding hydroxide M(OH) (M= Li, Na, K, Rb, Cs) was added to a solution of {(<sup>t</sup>BuO)<sub>3</sub>SiO<sub>3</sub>TiNEt<sub>2</sub> (**1**) in THF. The reaction mixture was vigorously stirred at 40 °C for 2 h. Subsequently, all volatiles were removed under reduced pressure. Then, the product was purified by crystallization from a saturated hexane solution. It should be noted that yields are reported after crystallization.

**[(<sup>t</sup>BuO)<sub>3</sub>SiO<sub>3</sub>TiOLi]<sub>2</sub> (**2**):** LiOH (0.010 g, 0.44 mmol); **1** (0.400 g, 0.44 mmol); stirring for 2 h. Yield: 0.160 g, 42%. M.p. >300 °C (dec.). Elemental Analysis (%) Calcd C<sub>72</sub>H<sub>162</sub>O<sub>26</sub>Si<sub>6</sub>Li<sub>2</sub>Ti<sub>2</sub> (1720.925 gmol<sup>-1</sup>): C 50.21, H 9.48; found: C 49.41, H 9.27. IR (ATR) (cm<sup>-1</sup>)  $\tilde{\nu}$  2972, 2931 (w, C–H, CH<sub>3</sub>), 1049 (s, Si–O), 962 (s, Si–O–Ti). <sup>1</sup>H NMR (C<sub>6</sub>D<sub>6</sub>, 300.53 MHz, 25 °C): δ (ppm) 1.59 (s, CH<sub>3</sub>). NCI-MS: *m/z* (%) 854 (100) [M – Li]<sup>-</sup>.

**[(<sup>t</sup>BuO)<sub>3</sub>SiO<sub>3</sub>TiONa]<sub>2</sub> (**3**):** NaOH (0.011 g, 0.27 mmol); **1** (0.250 g, 0.27 mmol); stirring for 2 h. Yield: 0.110 g, 46%. M.p. >300 °C (dec.). IR (ATR) (cm<sup>-1</sup>)  $\tilde{\nu}$  2972, 2931 (w, C–H, CH<sub>3</sub>), 1057 (s, Si–O), 967 (s, Si–O–Ti). Elemental Analysis (%) C<sub>72</sub>H<sub>162</sub>O<sub>26</sub>Si<sub>6</sub>Na<sub>2</sub>Ti<sub>2</sub> (1754.27 gmol<sup>-1</sup>): C 49.30, H 9.31; found: C 48.36, H 9.15. <sup>1</sup>H NMR (C<sub>6</sub>D<sub>6</sub>, 300.53 MHz, 25 °C): δ (ppm) 1.58 (s, CH<sub>3</sub>). NCI-MS: *m/z* (%) 854 (100) [M – Na]<sup>-</sup>.

**[(<sup>t</sup>BuO)<sub>3</sub>SiO<sub>3</sub>TiOK]<sub>2</sub> (**4**):** KOH (0.012 g, 0.22 mmol); **1** (0.200 g, 0.22 mmol); stirring for 2 h. Yield 0.115 g, 58%. M.p. >300 °C (dec.). Elemental Analysis (%) for C<sub>72</sub>H<sub>162</sub>O<sub>26</sub>Si<sub>6</sub>K<sub>2</sub>Ti<sub>2</sub> (1786.48 gmol<sup>-1</sup>): C 48.41, H 9.14; found: C 48.43, H 9.16. FT-IR (ATR) (cm<sup>-1</sup>) 2972, 2930 (w, C–H, CH<sub>3</sub>), 1046 (s, Si–O), 967 (s, Si–O–Ti). <sup>1</sup>H

NMR ( $C_6D_6$ , 300.53 MHz, 25 °C)  $\delta$  (ppm) 1.57 (s,  $CH_3$ ). NCI-MS:  $m/z$  (%) 854 (100)  $[M - K]^-$ .

**[{( $^tBuO$ ) $_3SiO$ ] $_3TiORb$ ] $_2$  (5):** RbOH (0.022 g, 0.22 mmol); **1** (0.200 g, 0.22 mmol); stirring for 2 h. Yield 0.101 g, 48%. M.p. >300 °C (dec.). FT-IR (ATR) ( $cm^{-1}$ )  $\tilde{\nu}$  2972, 2931 (w, C–H,  $CH_3$ ), 1049 (s, Si–O), 964 (s, Si–O–Ti). Elemental Analysis (%) for  $C_{72}H_{162}O_{26}Si_6Rb_2Ti_2$  (1879.22  $gmol^{-1}$ ): C 46.02, H 8.69; found: C 45.64, H 8.70.  $^1H$  NMR ( $C_6D_6$ , 300.53 MHz, 25 °C)  $\delta$  ppm: 1.56 (s,  $CH_3$ ). NCI-MS:  $m/z$  (%) 854 (100)  $[M - Rb]^-$ .

**[{( $^tBuO$ ) $_3SiO$ ] $_3TiOCs$ ] $_2$  (6):** CsOH (0.033 g, 0.22 mmol); **1** (0.200 g, 0.22 mmol); stirring for 2 h. Yield 0.098 g, 45%. M.p. >300 °C (dec.). FT-IR (ATR) ( $cm^{-1}$ )  $\tilde{\nu}$  2972, 2930 (w, C–H,  $CH_3$ ), 1050 (s, Si–O), 968 (s, Si–O–Ti). Elemental Analysis (%)  $C_{72}H_{162}O_{26}Si_6Cs_2Ti_2$  (1974.09  $gmol^{-1}$ ): C 43.81, H 8.21; found: C 41.48, H 7.71.  $^1H$  NMR ( $C_6D_6$ , 300.53 MHz, 25 °C)  $\delta$  ppm: 1.56 (s,  $CH_3$ ). NCI-MS:  $m/z$  (%) 854 (100)  $[M - Cs]^-$ .

**{( $^tBuO$ ) $_3SiO$ ] $_3TiO^tBu$  (7):** A solution of  $^tBuOH$  (0.5 M in THF, 0.4 mL) was added dropwise to a stirred cold solution of **1** (0.200 g, 0.22 mmol) in THF. After stirring for 2 hours, all volatiles were removed under reduced pressure, and the product was isolated as a white powder. Yield: 0.194 g, 97%. M. p. = 274–276 °C. Elemental Analysis (%) Calcd. for  $C_{40}H_{91}O_{13}Si_3Ti$  (911.26  $gmol^{-1}$ ): C 52.72, H 9.95; found: C 51.77, H 9.65. FT-IR (ATR) ( $cm^{-1}$ )  $\tilde{\nu}$  2973, 2930 (w, C–H,  $CH_3$ ,  $CH_2$ ), 1055 (s, Si–O–C), 904 (s, Si–O–C).  $^1H$  NMR (300.53 MHz,  $C_6D_6$ , 25 °C):  $\delta$  (ppm) 1.55 (s, 9H, for  $TiOC(CH_3)_3$ ), 1.53 (s, 81H, for  $SiOC(CH_3)_3$ ).  $^{13}C\{^1H\}$  NMR (75.57 MHz,  $C_6D_6$ , 25 °C):  $\delta$  (ppm) 86.8 ( $TiOC(CH_3)_3$ ), 72.7  $SiOC(CH_3)_3$ , 32.2 ( $TiOC(CH_3)_3$ ), 32.1 ( $SiOC(CH_3)_3$ ).  $^{29}Si$  NMR (59.63 MHz,  $C_6D_6$ ):  $\delta$  (ppm) –101.5.

## 2. NMR spectra of compounds TS, AS, S1, 1–7

$^1\text{H}$  NMR (300 MHz,  $\text{CDCl}_3$ )

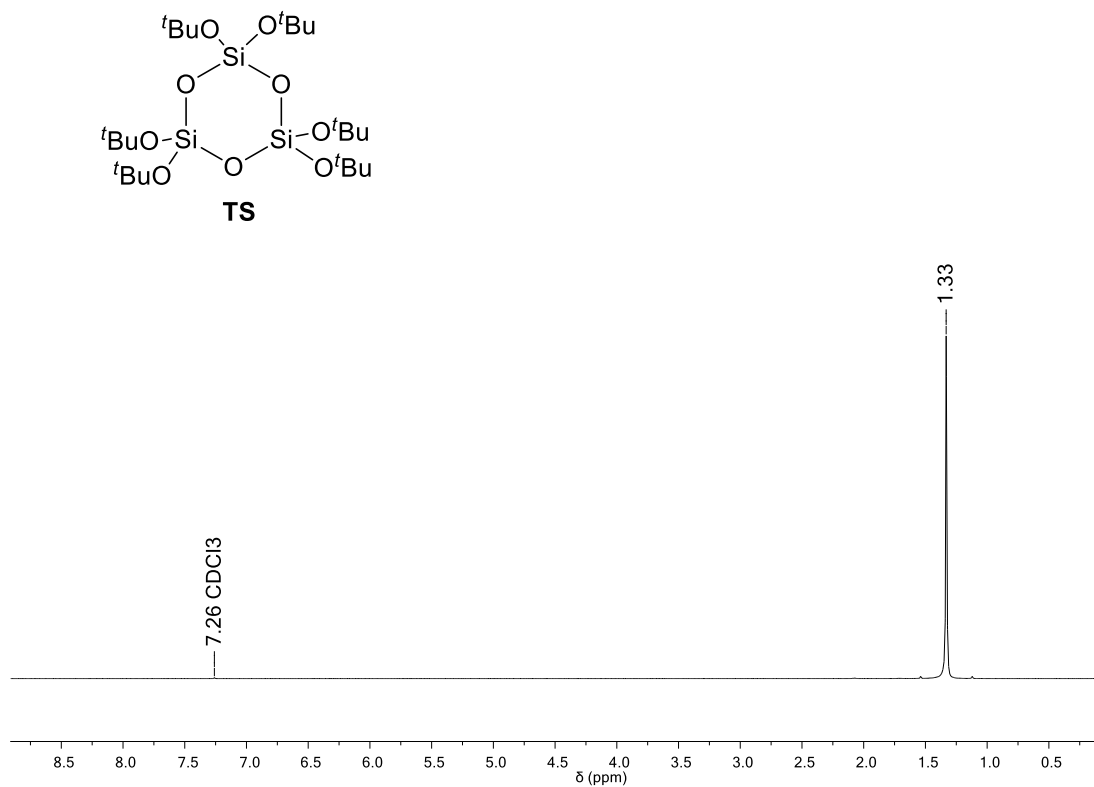

**Figure S1.**  $^1\text{H}$  NMR spectrum of compound **TS**.

$^{13}\text{C}$  NMR (75 MHz,  $\text{CDCl}_3$ )

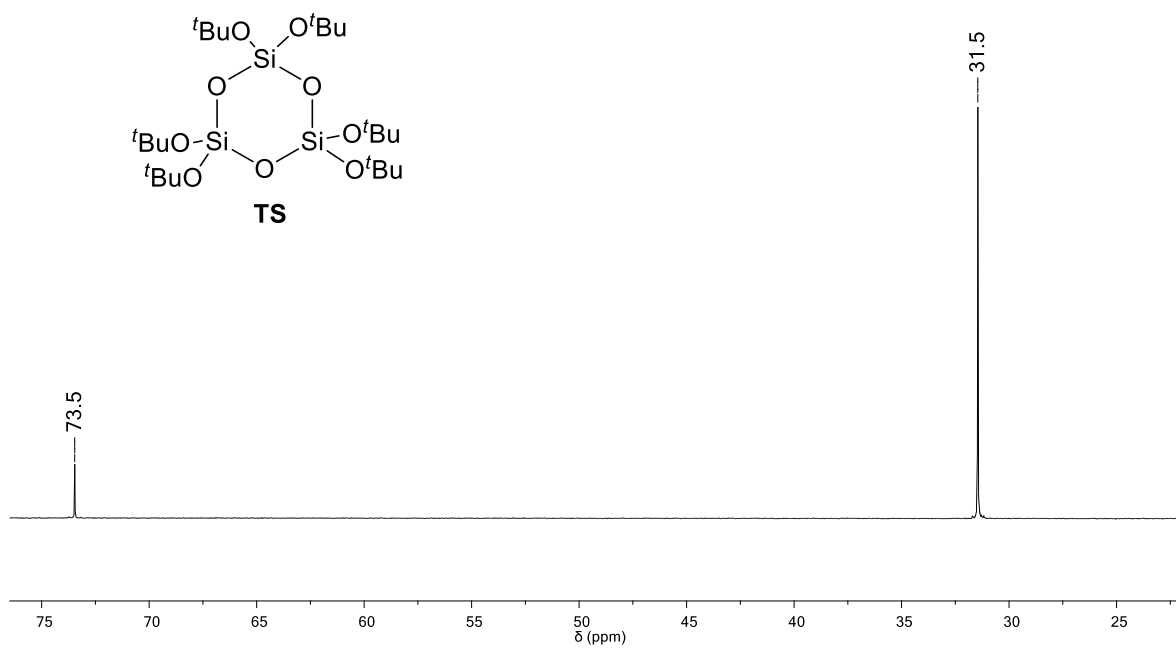

**Figure S2.**  $^{13}\text{C}$  NMR spectrum of compound TS.

$^{29}\text{Si}$  NMR (60 MHz,  $\text{CDCl}_3$ )

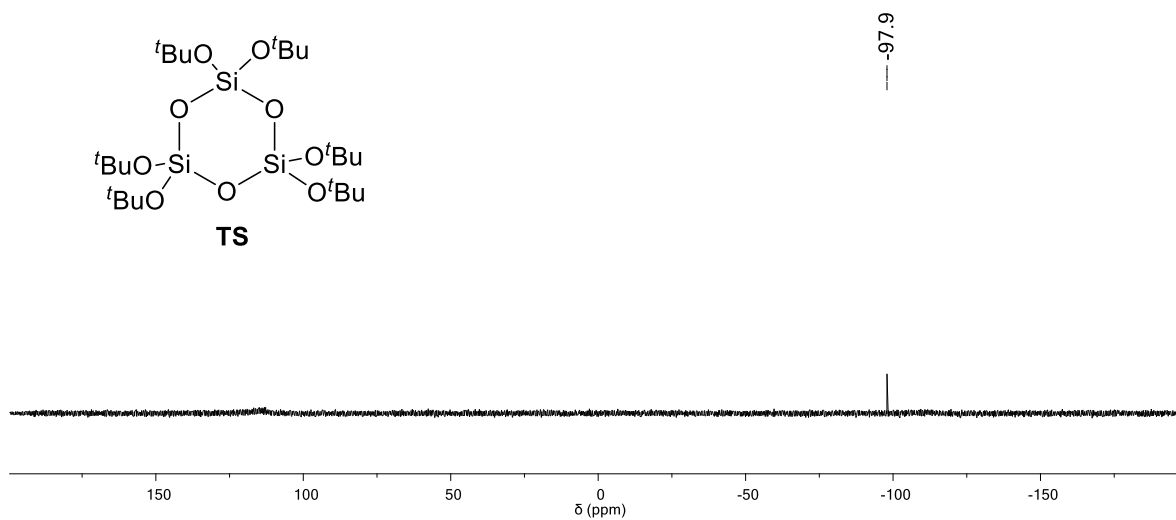

**Figure S3.**  $^{29}\text{Si}$  NMR spectrum of compound TS.

$^1\text{H}$  NMR (300 MHz,  $\text{CDCl}_3$ )

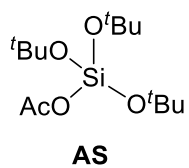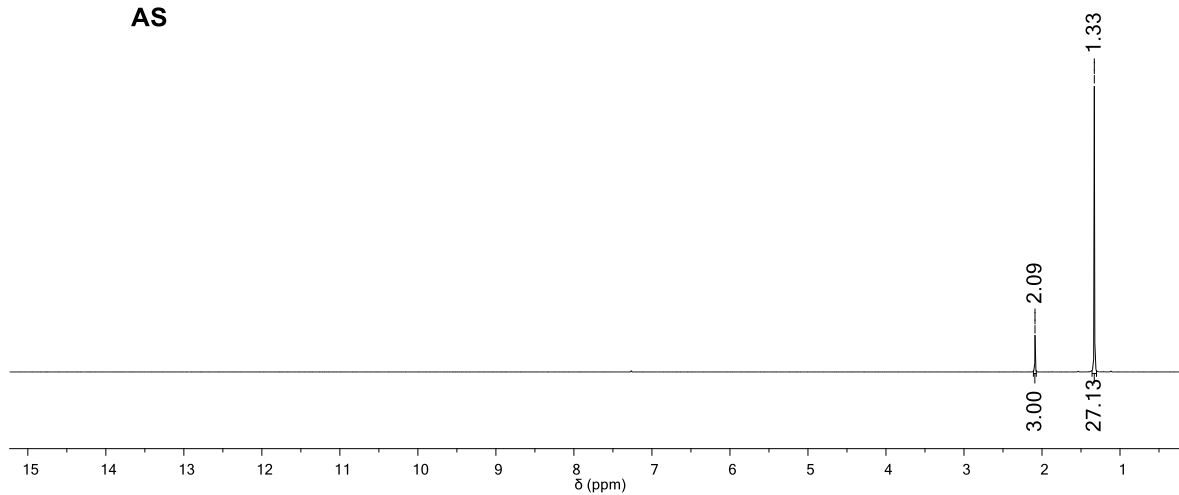

**Figure S4.**  $^1\text{H}$  NMR spectrum of compound **AS**.

$^{13}\text{C}$  NMR (75 MHz,  $\text{CDCl}_3$ )

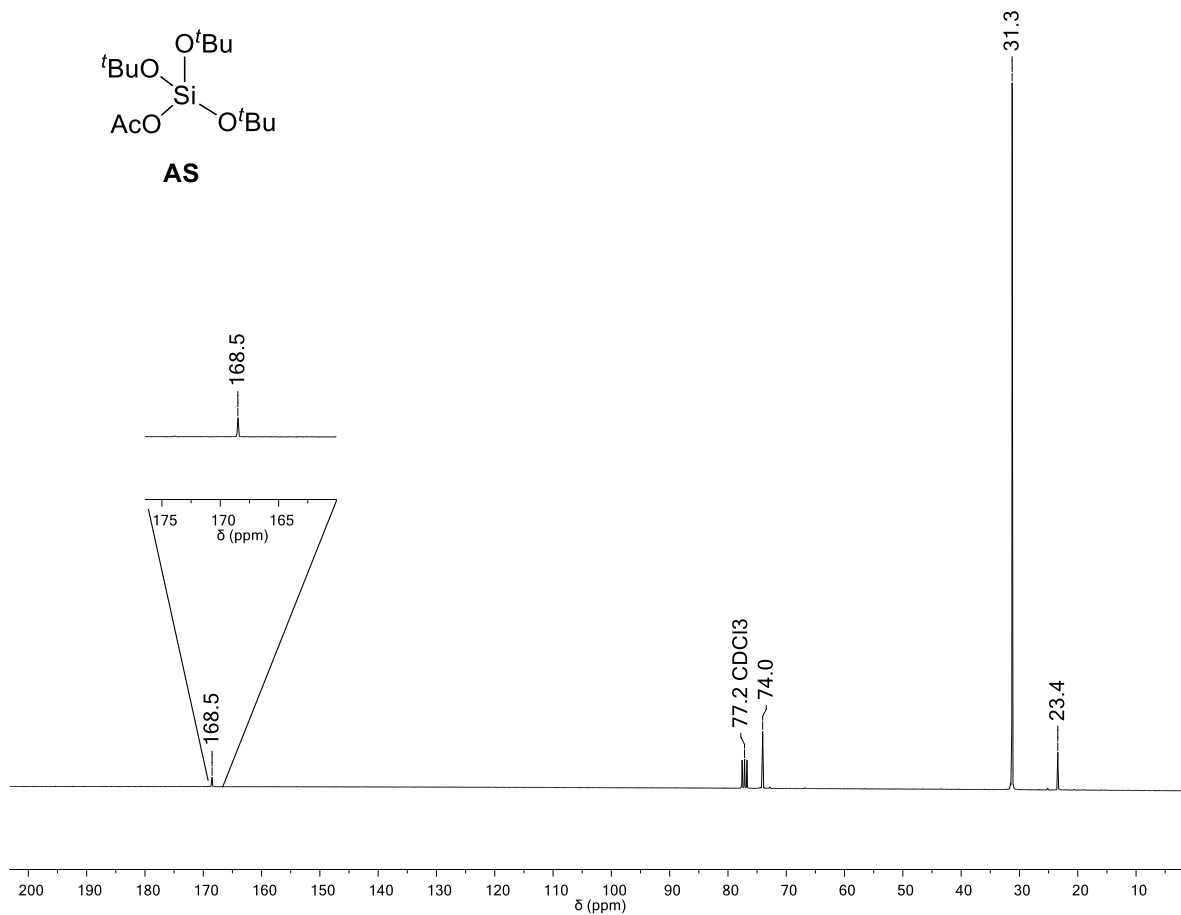

**Figure S5.**  $^{13}\text{C}$  NMR spectrum of compound **AS**.

$^{29}\text{Si}$  NMR (60 MHz,  $\text{CDCl}_3$ )

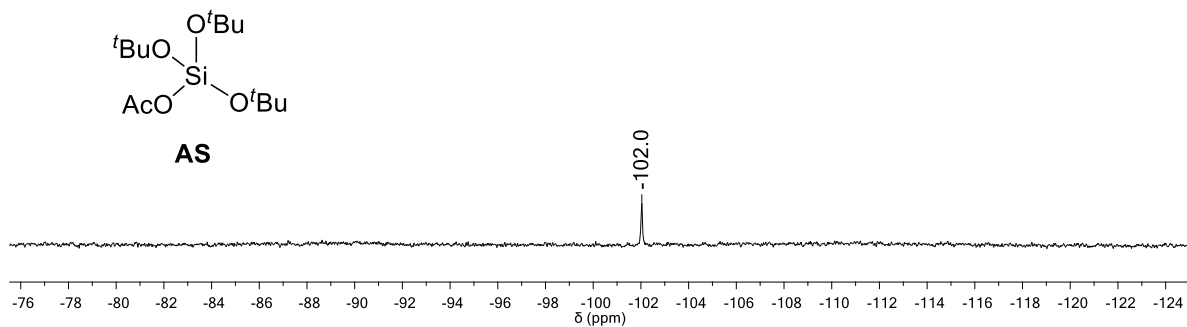

**Figure S6.**  $^{29}\text{Si}$  NMR spectrum of compound **AS**.



$^1\text{H}$  NMR (300 MHz,  $\text{CDCl}_3$ )

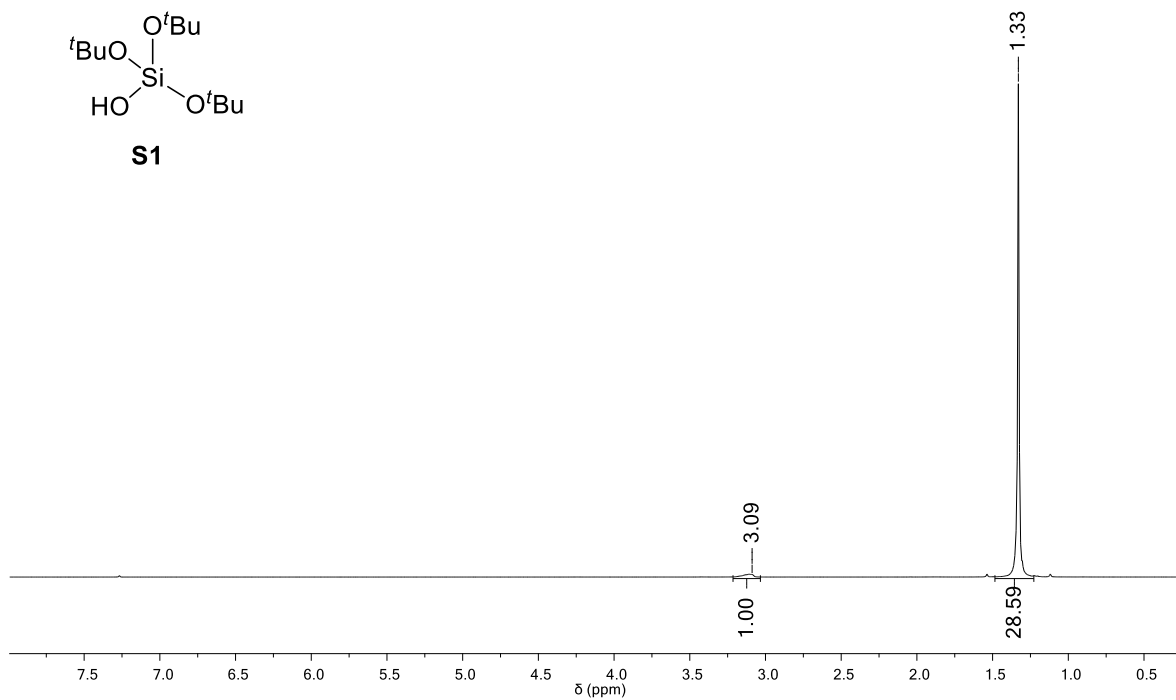

**Figure S7.**  $^1\text{H}$  NMR spectrum of compound **S1**.

$^{13}\text{C}$  NMR (75 MHz,  $\text{CDCl}_3$ )

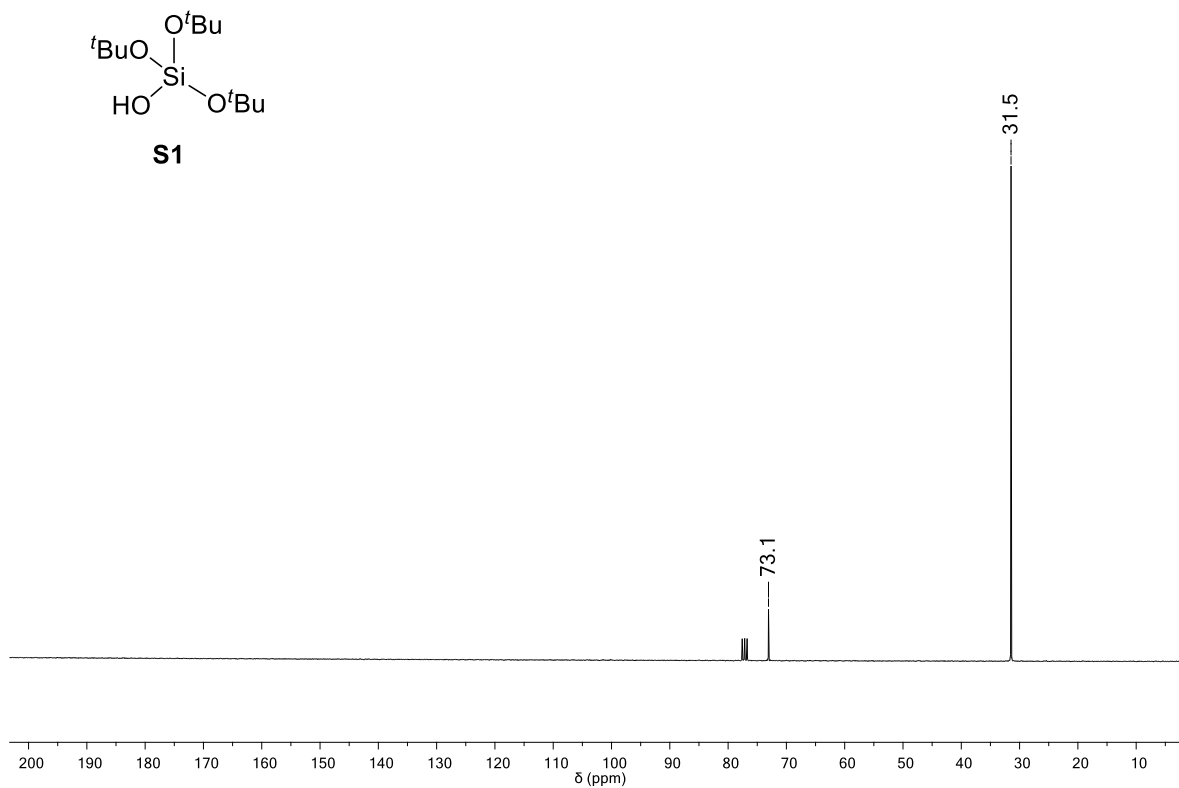

**Figure S8.**  $^{13}\text{C}$  NMR spectrum of compound **S1**.

$^{29}\text{Si}$  NMR (60 MHz,  $\text{CDCl}_3$ )

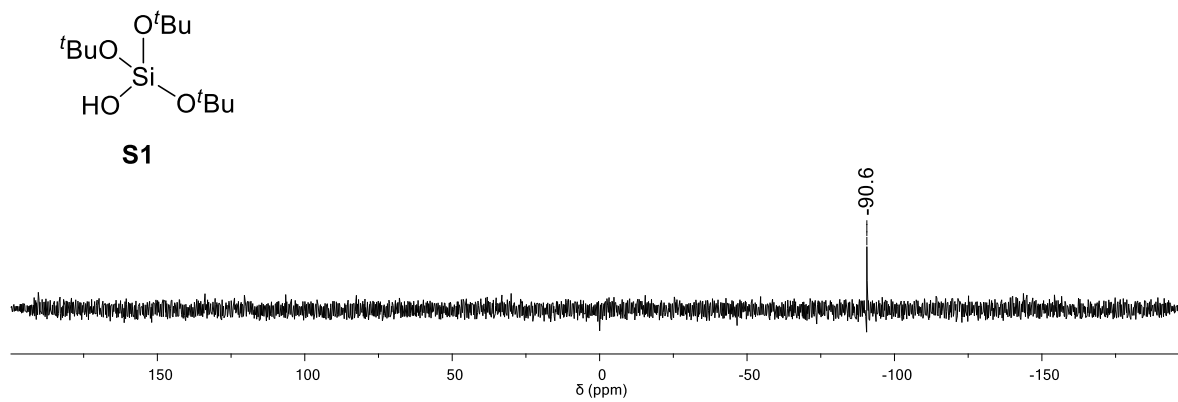

**Figure S9.**  $^{29}\text{Si}$  NMR spectrum of compound **S1**.

$^1\text{H}$  NMR (300 MHz,  $\text{C}_6\text{D}_6$ )

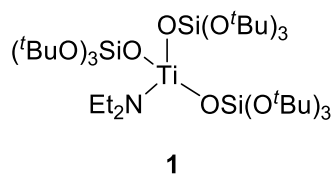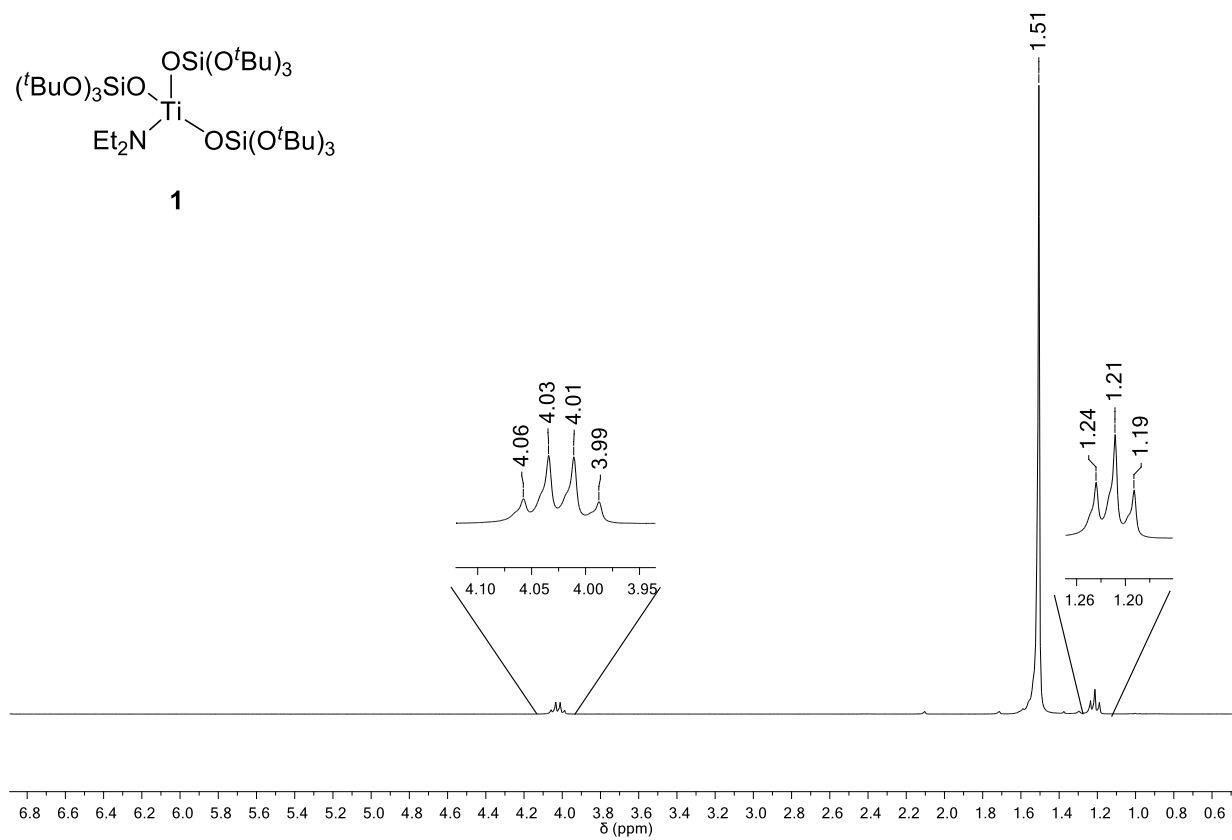

**Figure S10.**  $^1\text{H}$  NMR spectrum of compound **1**.

$^{13}\text{C}$  NMR (75 MHz,  $\text{C}_6\text{D}_6$ )

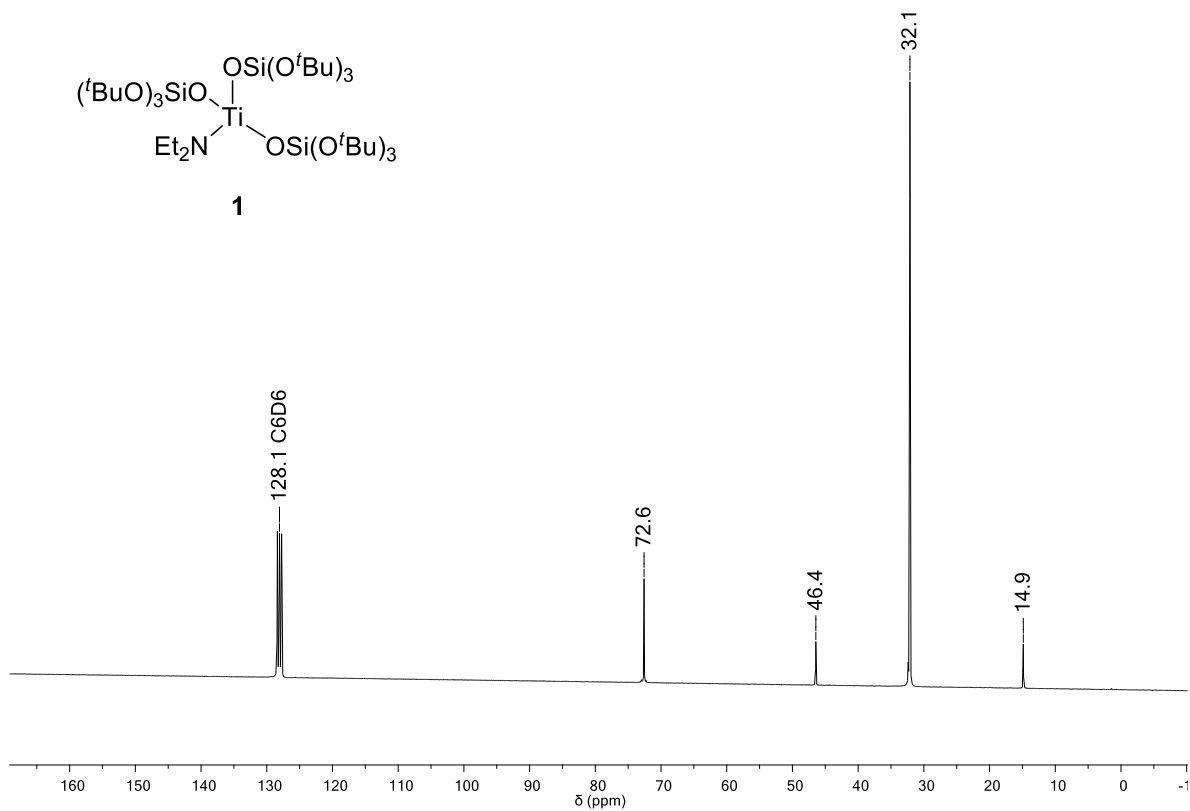

**Figure S11.**  $^{13}\text{C}$  NMR spectrum of compound **1**.

$^{29}\text{Si}$  NMR (60 MHz,  $\text{C}_6\text{D}_6$ )

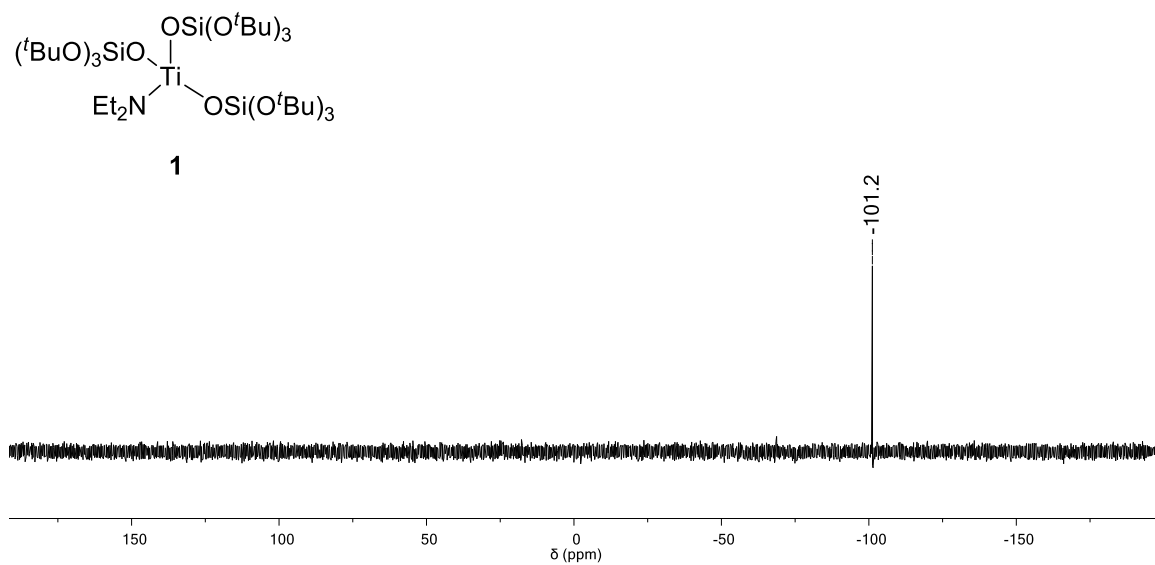

**Figure S12.**  $^{29}\text{Si}$  NMR spectrum of compound **1**.

$^1\text{H}$  NMR (300 MHz,  $\text{C}_6\text{D}_6$ )

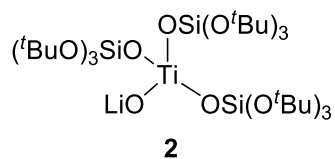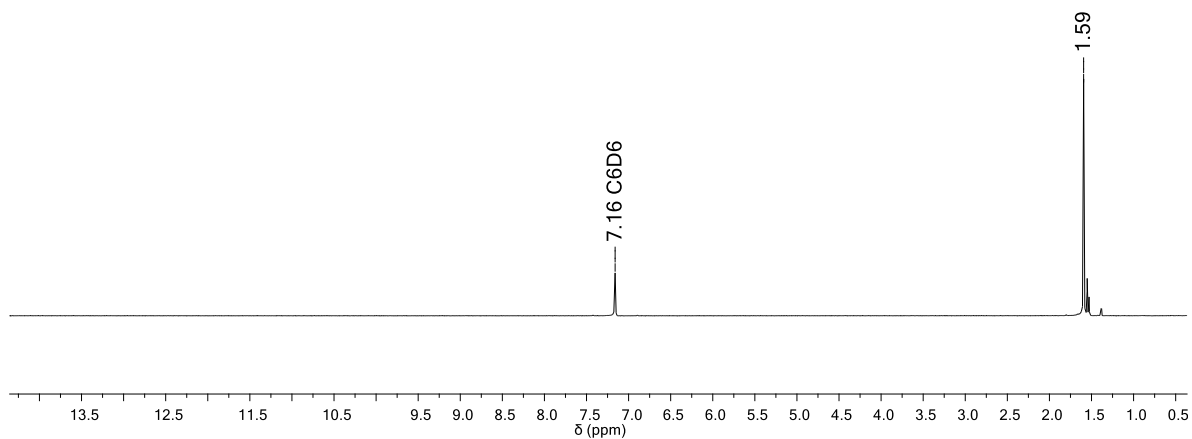

**Figure S13.**  $^1\text{H}$  NMR spectrum of compound **2**. \*Due to higher solubility of the impurities, when compared to the titanosilicate **2**, their signals are visible, but their intensities do not correspond to the real concentration in the sample.

$^1\text{H}$  NMR (300 MHz,  $\text{C}_6\text{D}_6$ )

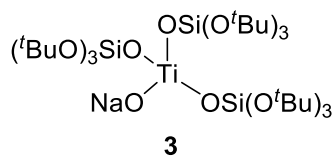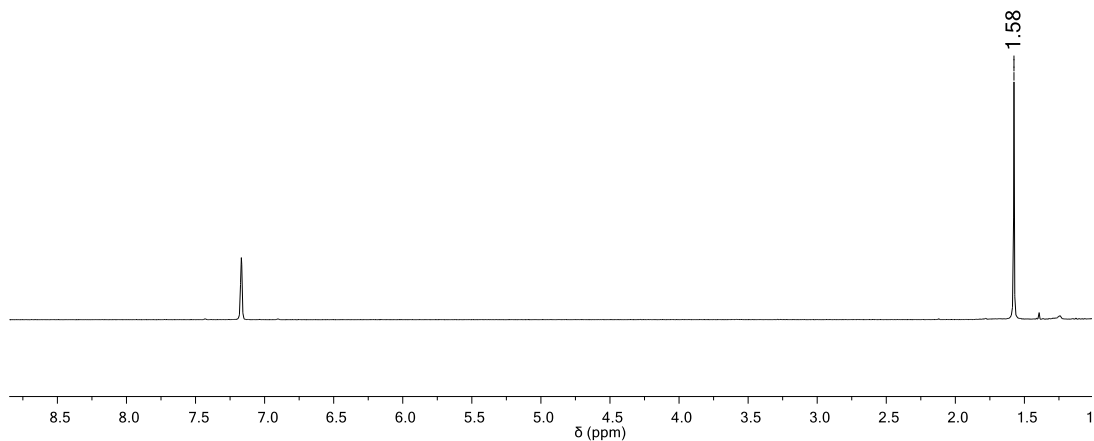

**Figure S14.**  $^1\text{H}$  NMR spectrum of compound **3**.

$^1\text{H}$  NMR (300 MHz,  $\text{C}_6\text{D}_6$ )

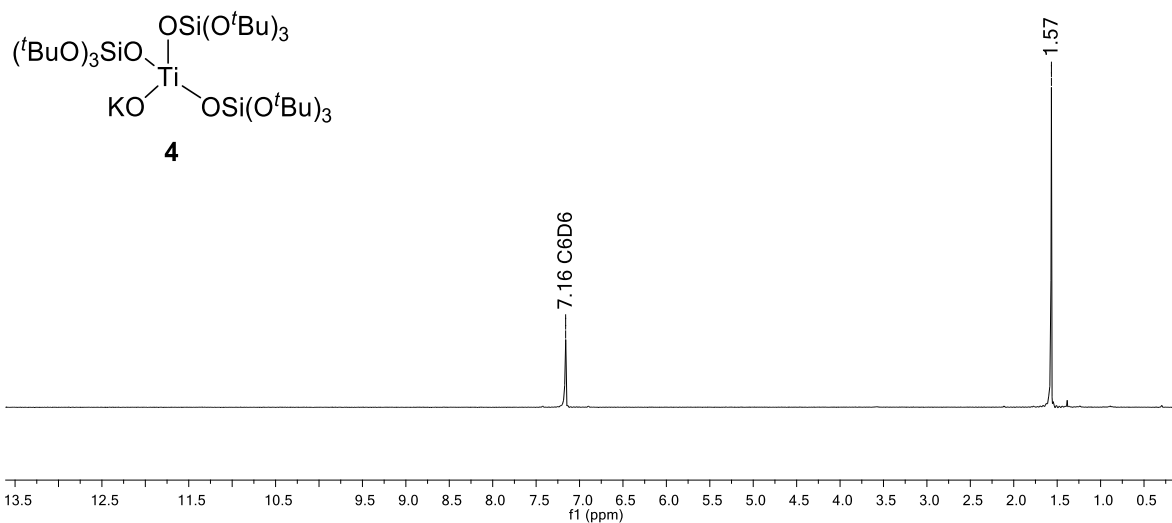

**Figure S15.**  $^1\text{H}$  NMR spectrum of compound **4**.

$^1\text{H}$  NMR (300 MHz,  $\text{C}_6\text{D}_6$ )

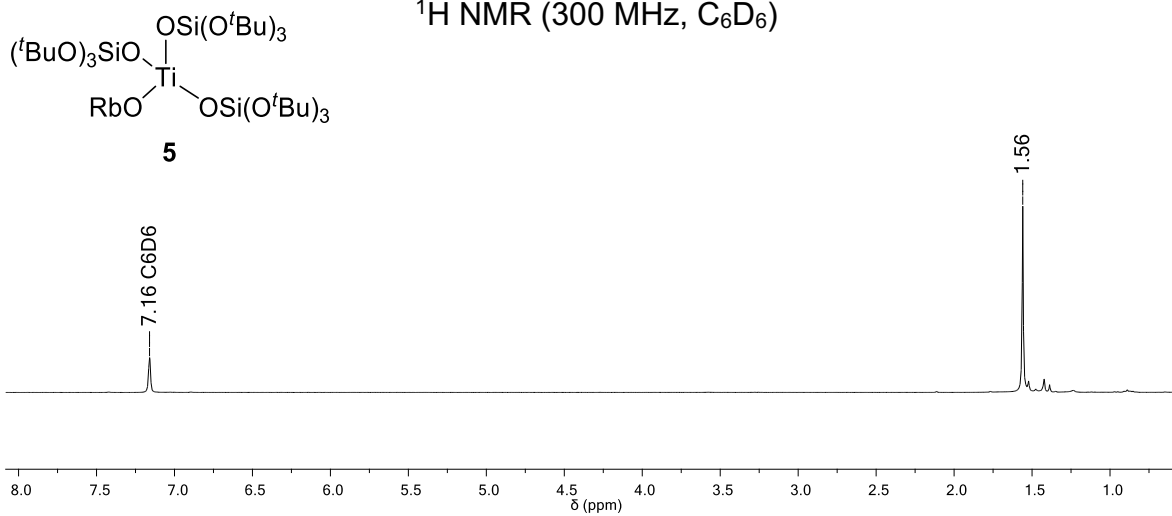

**Figure S16.**  $^1\text{H}$  NMR spectrum of compound **5**.

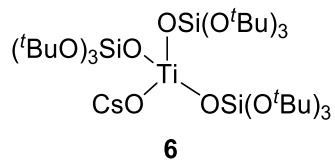

$^1\text{H NMR}$  (300 MHz,  $\text{C}_6\text{D}_6$ )

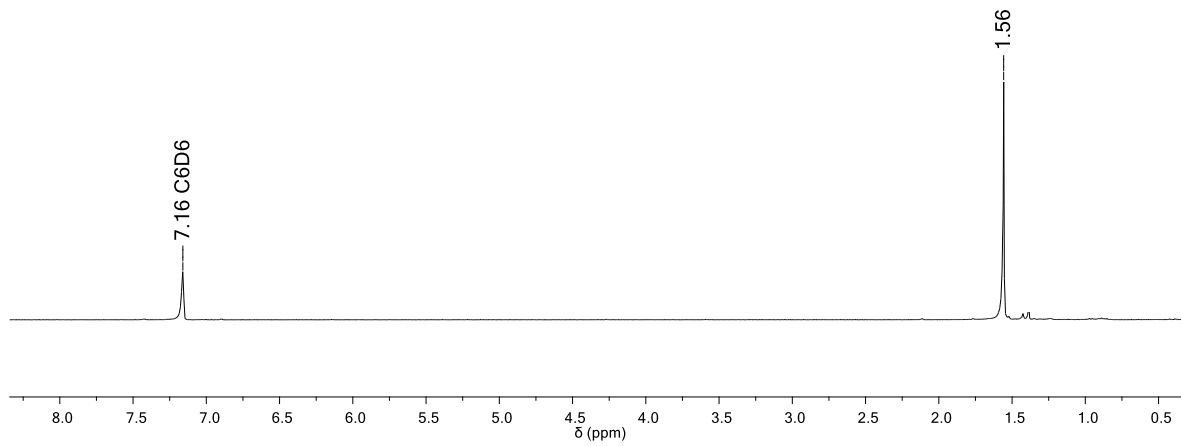

**Figure S17.**  $^1\text{H NMR}$  spectrum of compound **6**.

$^1\text{H}$  NMR (300 MHz,  $\text{C}_6\text{D}_6$ )

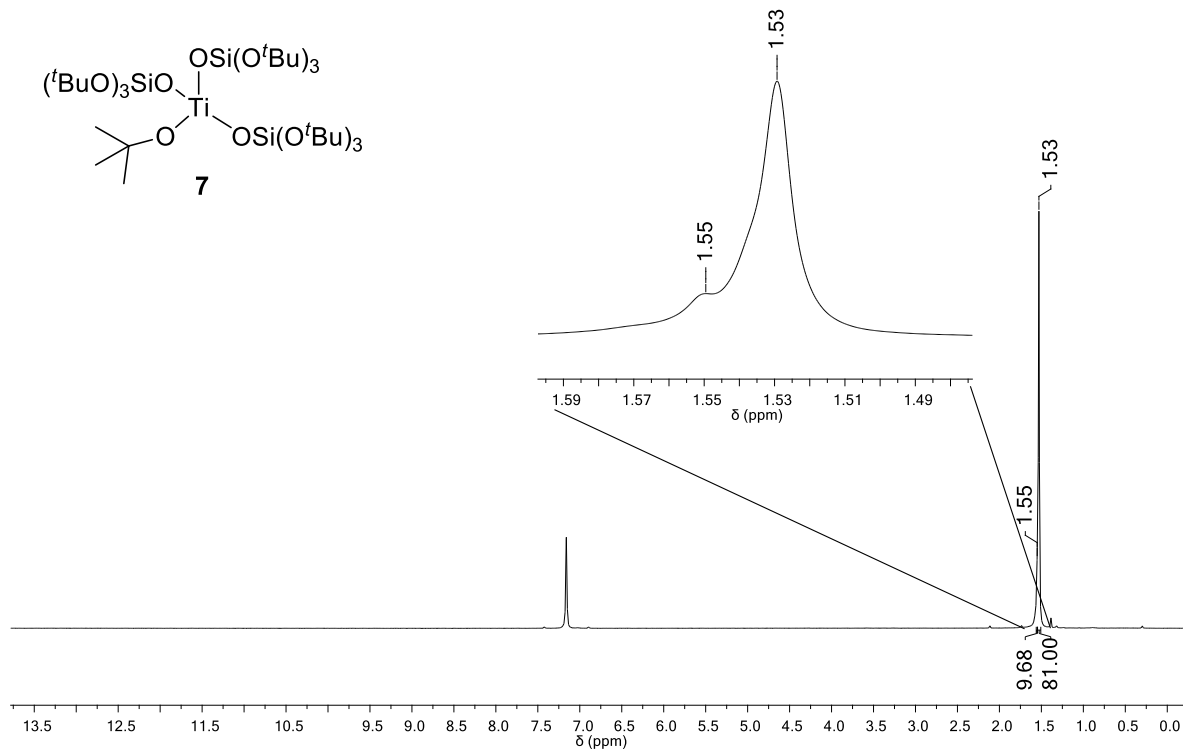

**Figure S18.**  $^1\text{H}$  NMR spectrum of compound 7.



$^{13}\text{C}$  NMR (75 MHz,  $\text{C}_6\text{D}_6$ )

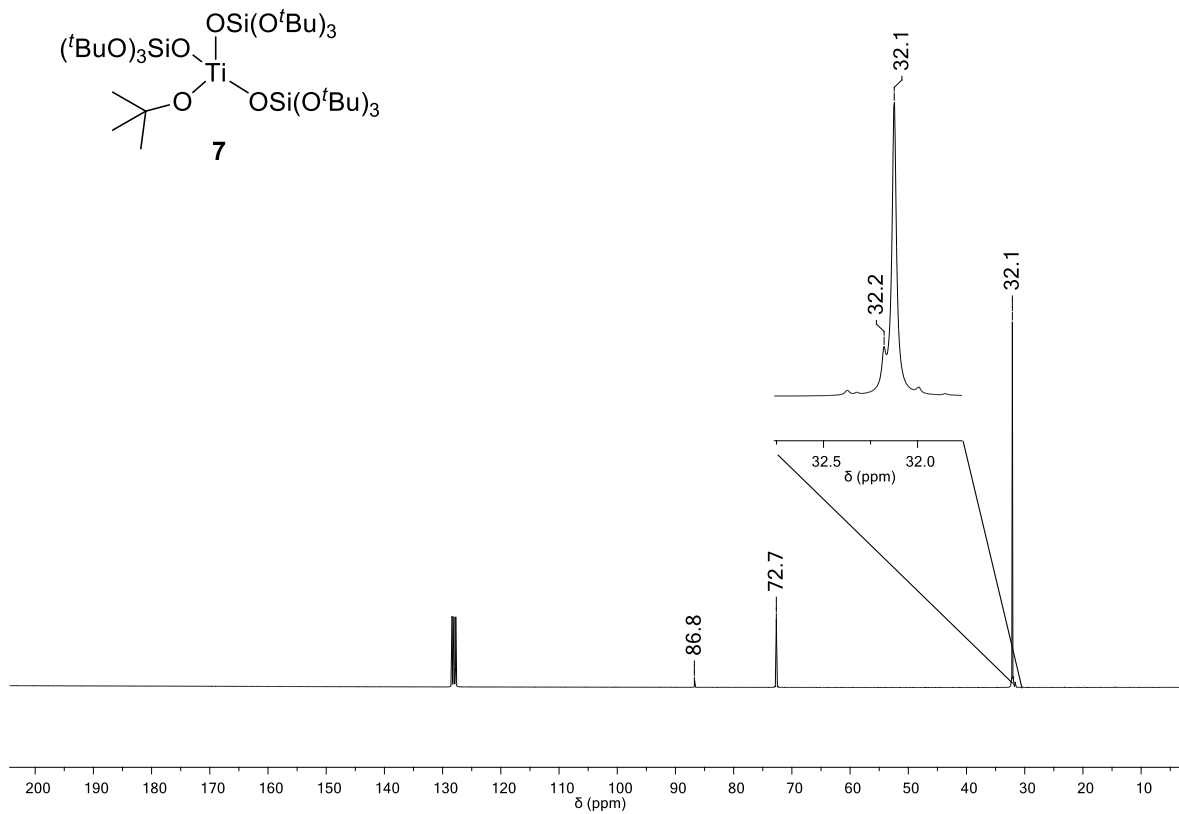

**Figure S19.**  $^{13}\text{C}$  NMR spectrum of compound 7.

$^{29}\text{Si}$  NMR (60 MHz,  $\text{C}_6\text{D}_6$ )

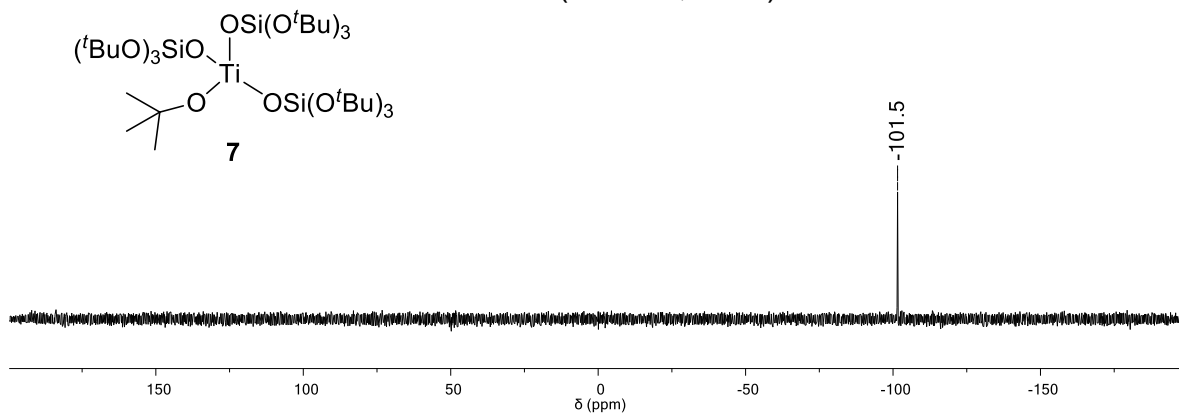

**Figure S20.**  $^{29}\text{Si}$  NMR spectrum of compound 7.

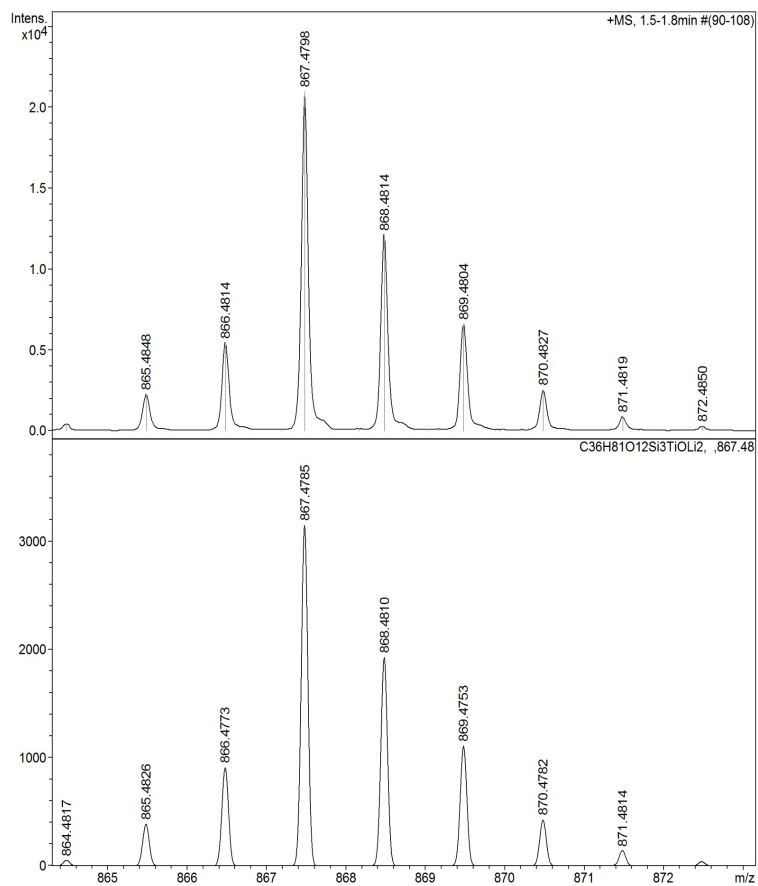

**Figure S21.** Experimental isotopic pattern of  $[L_3TiOLi_2]^+$  (a) fragments peak in ESI-HRMS (positive mode) obtained for compound **2** (top). Simulated isotopic pattern for the later fragment (bottom). Error: 2.1 ppm.

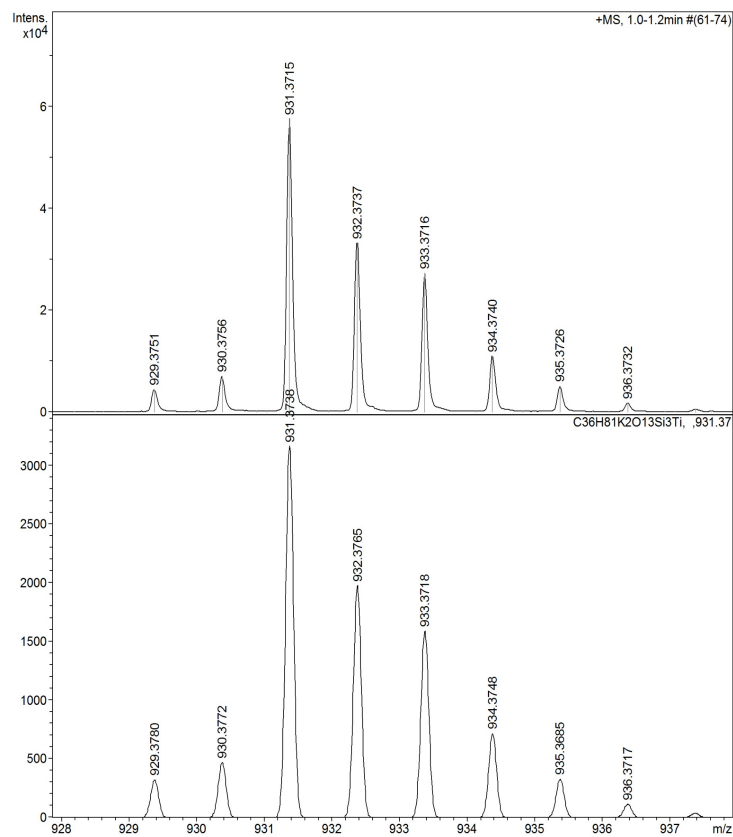

**Figure S22.** Experimental isotopic pattern of  $[\text{L}_3\text{TiOK}_2]^+$  (a) fragments peak in ESI-HRMS (positive mode) obtained for compound **2** (top). Simulated isotopic pattern for the later fragment (bottom). Error: 1.9 ppm.

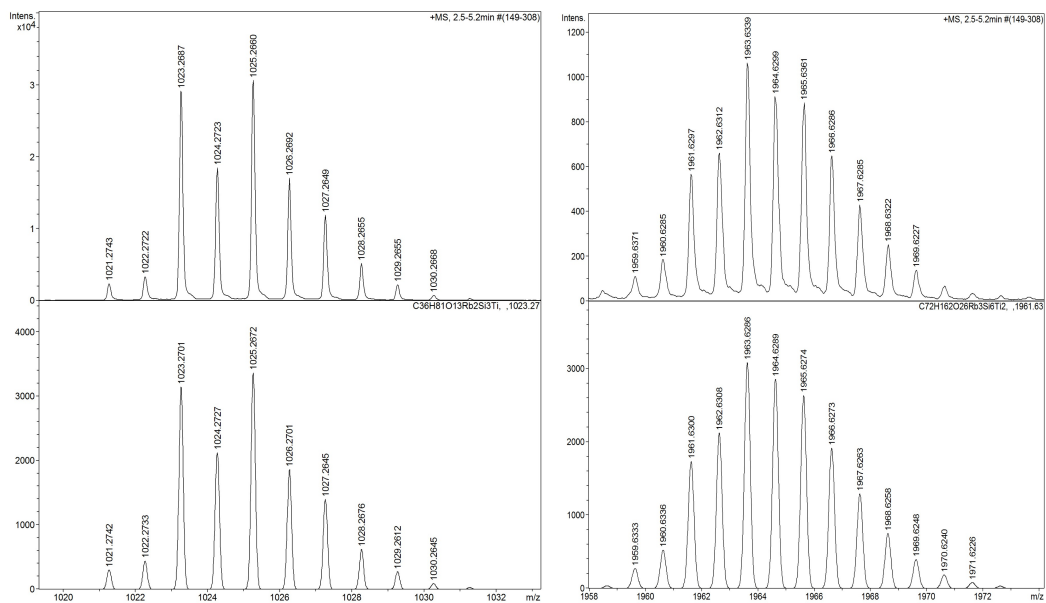

**Figure S23.** Experimental isotopic pattern of  $[L_3TiORb_2]^+$  (a) and  $[L_6Ti_2O_2Rb_3]^+$  (b) fragments peak in ESI-HRMS (positive mode) obtained for compound **1** (top). Simulated isotopic pattern for the later fragment (bottom). Error: 2.4 ppm in (a) and 2.6 ppm in (b).

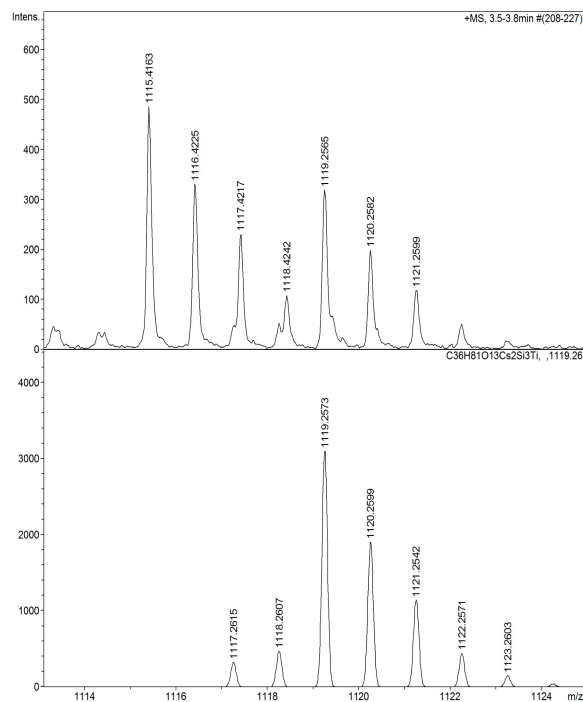

**Figure S24.** Experimental isotopic pattern of  $[L_3TiOCs_2]^+$  (a) fragments peak in ESI-HRMS (positive mode) obtained for compound 1 (top). Simulated isotopic pattern for the later fragment (bottom). Error: 0.71 ppm.

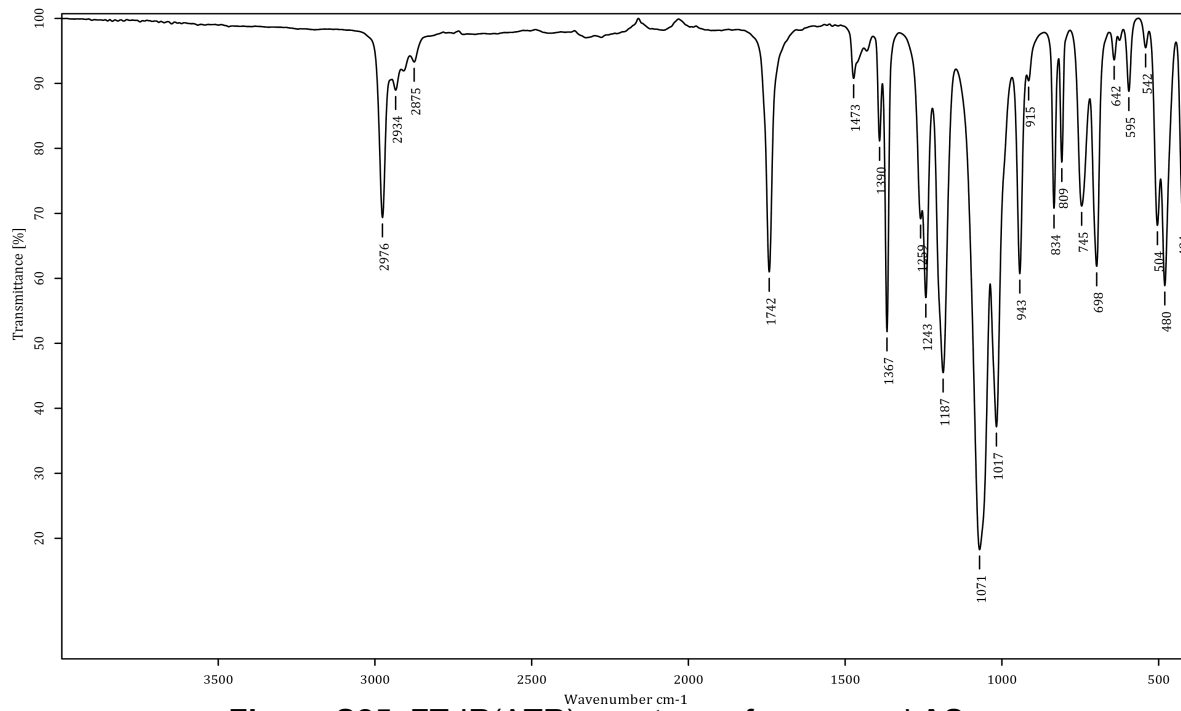

**Figure S25.** FT-IR(ATR) spectrum of compound **AS**.

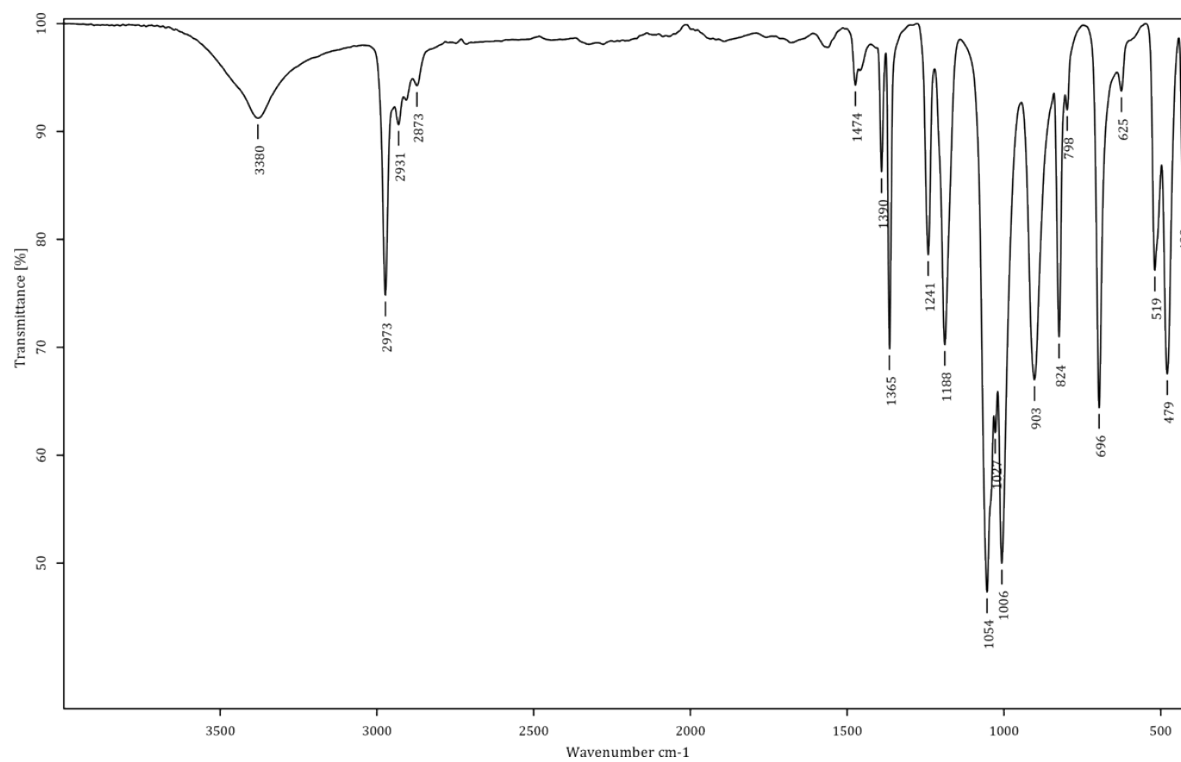

**Figure S26.** FT-IR(ATR) spectrum of compound **S1**.

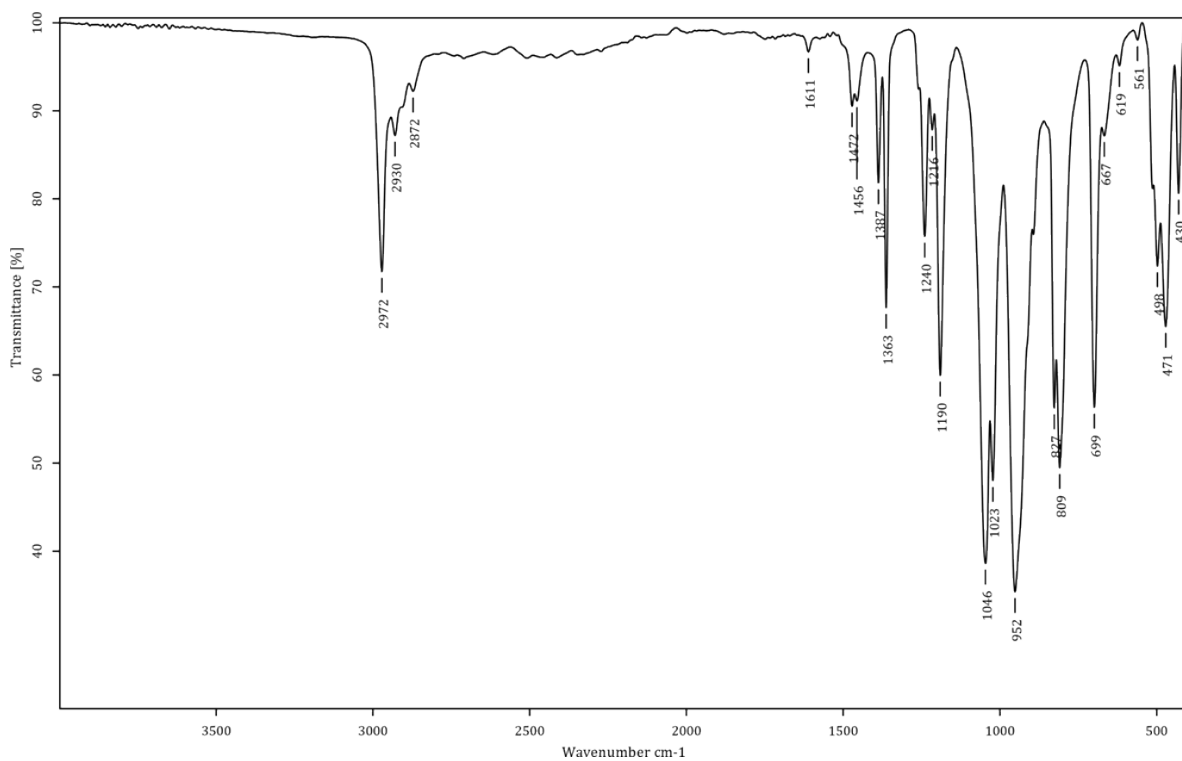

**Figure S27.** FT-IR(ATR) spectrum of compound 1.

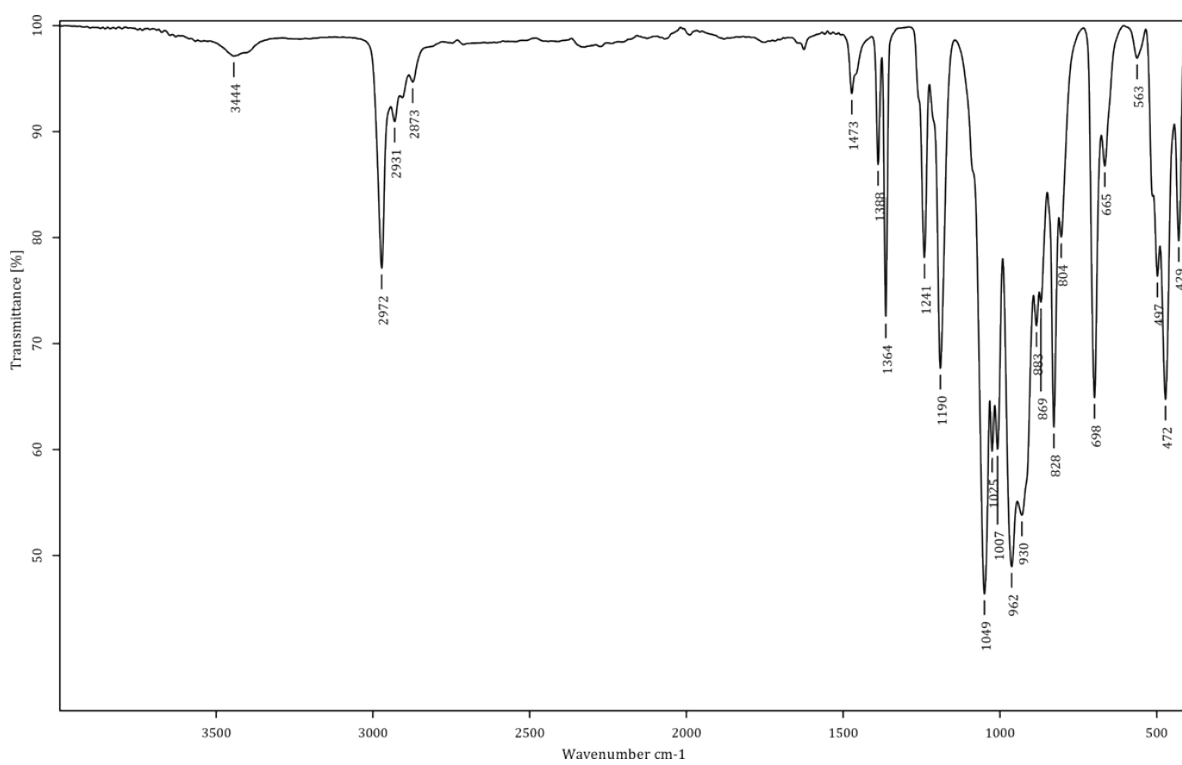

**Figure S28.** FT-IR(ATR) spectrum of compound 2.

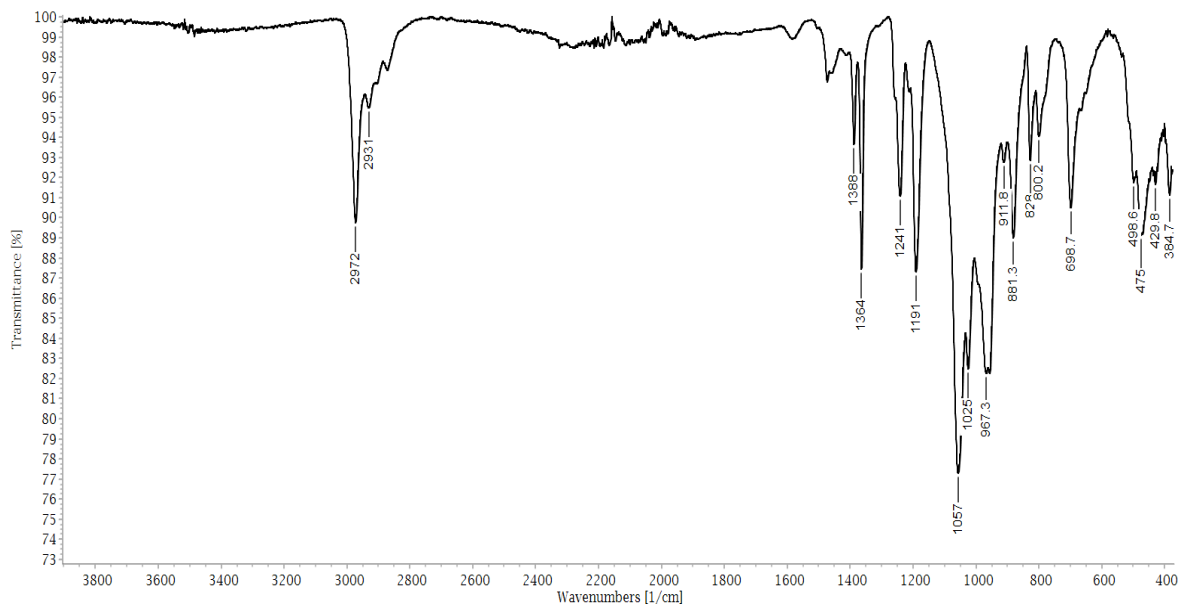

**Figure S29.** FT-IR(ATR) spectrum of compound 3.

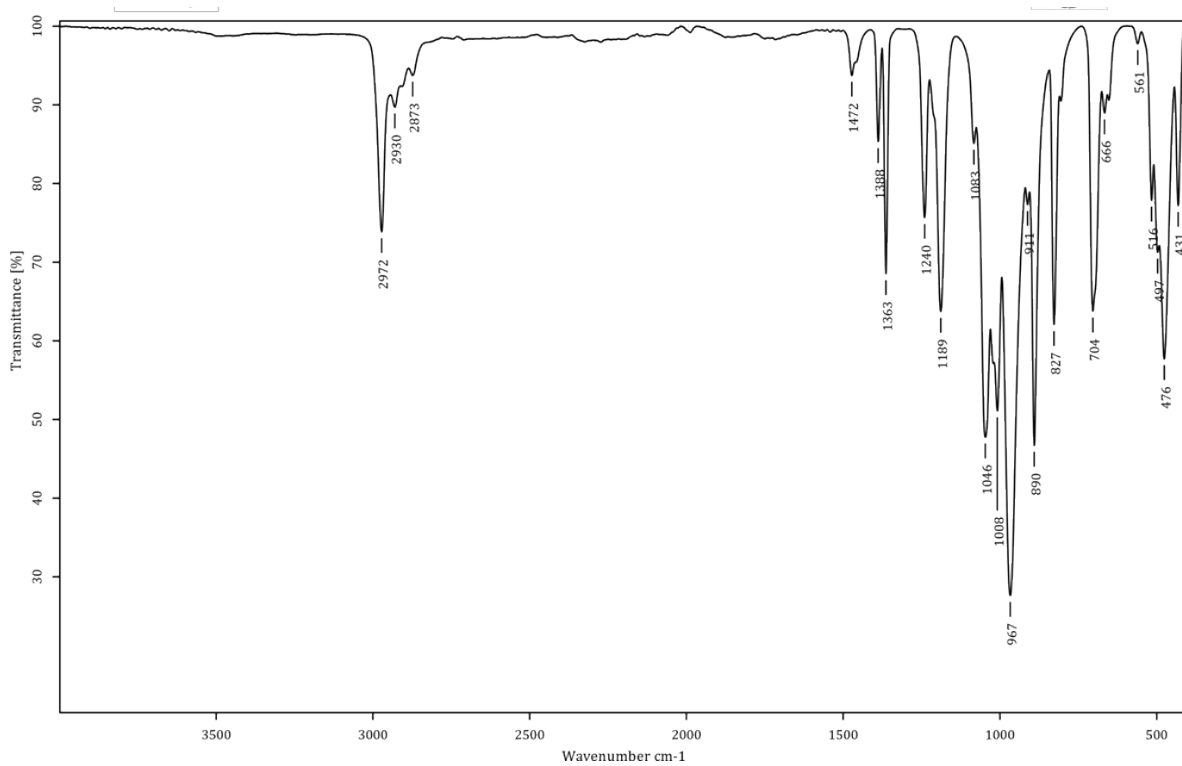

**Figure S30.** FT-IR(ATR) spectrum of compound 4.



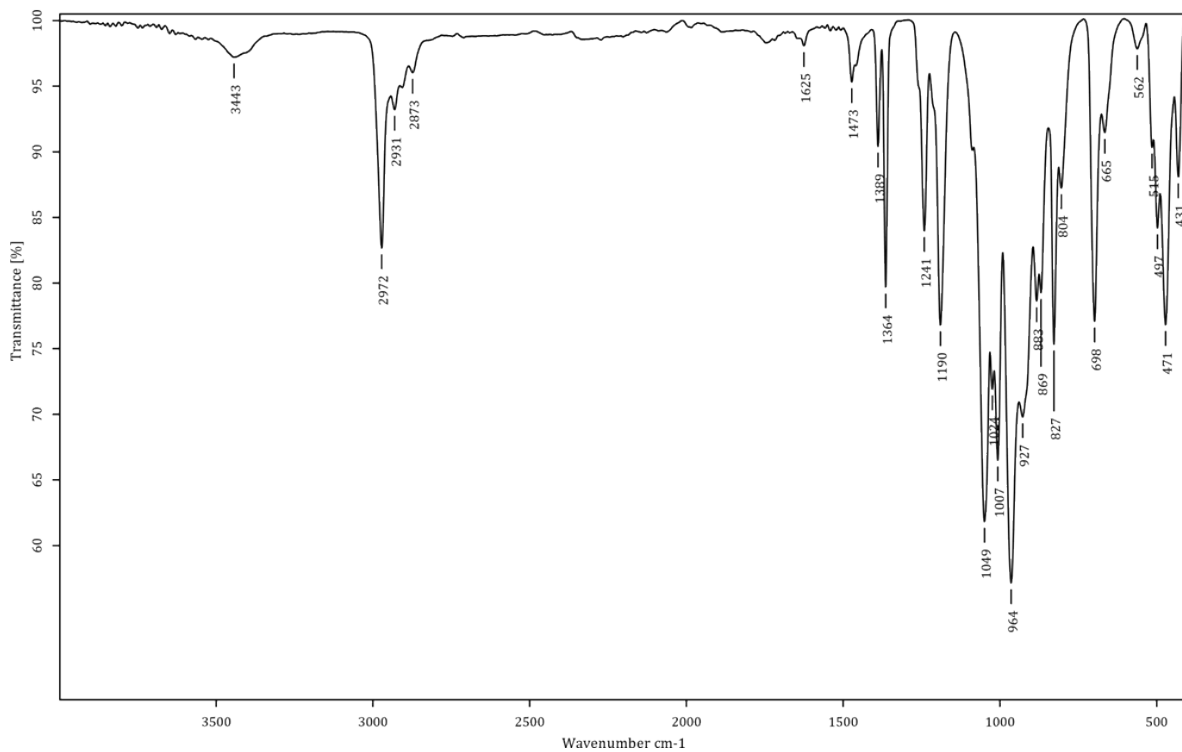

**Figure S31.** FT-IR(ATR) spectrum of compound 5.

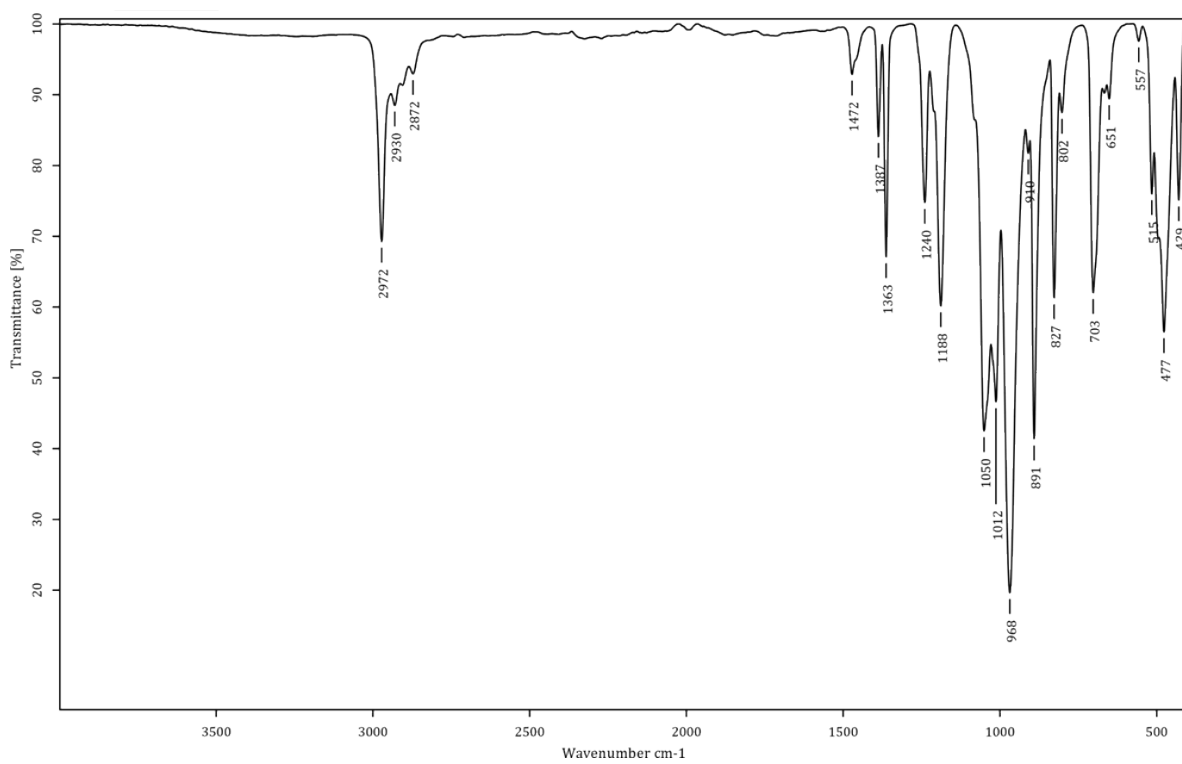

**Figure S32.** FT-IR(ATR) spectrum of compound 6.

### 3. Molecular structure of [(<sup>t</sup>BuO)<sub>3</sub>Si(μ-O)]<sub>3</sub> (TS)

Compound **TS** crystallizes in the triclinic space group  $P\bar{1}$ . It is noteworthy, that this compound crystallized as a non-merohedral twin. In Figure S33, the molecular structure is shown. In this compound, the SiO<sub>4</sub> units have a distorted tetrahedral geometry with angles ranging from 104.84(8)–113.77(8)°. Selected bond lengths and angles are listed in Table S1 and crystallographic parameters are summarized in Table S2.

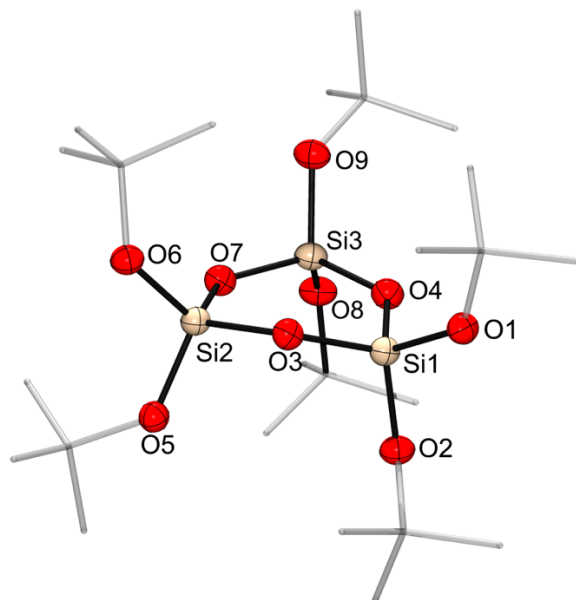

**Figure S33.** Molecular structure of compound **TS** with thermal ellipsoids set at 50% probability level. Carbon-bound hydrogen atoms and thermal ellipsoids of the carbon atoms were eliminated for the sake of clarity.

**Table S1.** Selected bond distances (Å) and angles (deg) for **TS**.

| 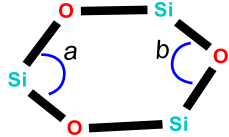 |                       |
|-------------------------------------------------------------------------------------|-----------------------|
| <b>TS</b>                                                                           |                       |
| Si–OSi (range)                                                                      | 1.6254(10)–1.6353(10) |
| Si–OC (range)                                                                       | 1.6078(10)–1.6321(10) |
| O–Si–O (range)                                                                      | 104.80(5)–113.68(5)   |
| O–Si–O (angle <i>a</i> range)                                                       | 106.18(5)–107.27(5)   |
| Si–O–Si (angle <i>b</i> range)                                                      | 128.19(6)–132.10(6)   |

#### 4. Crystallographic information for compounds 1–7

**Table S2.** Selected crystallographic data for compound **TS**.

| <b>TS</b>                                    |                                                                |
|----------------------------------------------|----------------------------------------------------------------|
| Empirical formula                            | C <sub>24</sub> H <sub>54</sub> O <sub>9</sub> Si <sub>3</sub> |
| Formula mass (g/mol)                         | 570.94                                                         |
| T (K)                                        | 100(2)                                                         |
| Crystal size (mm <sup>3</sup> )              | 0.562 x 0.348 x<br>0.104                                       |
| Space group                                  | <i>P</i> $\bar{1}$ .                                           |
| a (Å)                                        | 10.6208(6)                                                     |
| b (Å)                                        | 11.9586(6) Å                                                   |
| c (Å)                                        | 14.0651(8) Å                                                   |
| $\alpha$ (°)                                 | 100.242(2)                                                     |
| $\beta$ (°)                                  | 109.429(2)                                                     |
| $\gamma$ (°)                                 | 90.071(2)                                                      |
| V (Å <sup>3</sup> )                          | 1654.32(16)                                                    |
| Z                                            | 2                                                              |
| $\rho_{\text{calc.}}$ (g·cm <sup>-3</sup> )  | 1.146                                                          |
| $\mu$ (mm <sup>-1</sup> )                    | 1.673                                                          |
| F(000)                                       | 624                                                            |
| $\theta$ range for data collection (°)       | 3.393 to 70.117                                                |
| No. of reflections                           | 6116                                                           |
| No. of independent reflections               | 6116 [ $R_{\text{int}}$ =<br>( $R_{\text{int}}$ )              |
|                                              | 0.0395]                                                        |
| No. of data/restr./param.                    | 6116 / 0 / 344                                                 |
| Goodnes-on-fit (GOF) on $F^2$                | 1.068                                                          |
| $R_1,^a wR_2^b$ ( $I > 2\sigma(I)$ )         | 0.0314, 0.0873                                                 |
| $R_1,^a wR_2^b$ (all data)                   | 0.0336, 0.0892                                                 |
| Largest diff. peak/hole (e·Å <sup>-3</sup> ) | 0.254 / -0.312                                                 |
| CCDC                                         | 2156304                                                        |

<sup>a</sup>  $R_1 = \sum ||F_o| - |F_c|| / \sum |F_o|$ . <sup>b</sup>  $wR_2 = [\sum w(F_o^2 - F_c^2)^2 / \sum (F_o^2)^2]^{1/2}$

**Table S3.** Selected crystallographic data for compounds 1–3.

|                                                                                                       | 1                                                                   | 2                                                                                                | 3                                                                                                |
|-------------------------------------------------------------------------------------------------------|---------------------------------------------------------------------|--------------------------------------------------------------------------------------------------|--------------------------------------------------------------------------------------------------|
| Empirical formula                                                                                     | C <sub>40</sub> H <sub>91</sub> O <sub>12</sub> NSi <sub>3</sub> Ti | C <sub>72</sub> H <sub>162</sub> O <sub>26</sub> Si <sub>6</sub> Ti <sub>2</sub> Li <sub>2</sub> | C <sub>72</sub> H <sub>162</sub> O <sub>26</sub> Si <sub>6</sub> Ti <sub>2</sub> Na <sub>2</sub> |
| Formula mass (g/mol)                                                                                  | 910.3                                                               | 1722.23                                                                                          | 1754.33                                                                                          |
| T (K)                                                                                                 | 100(2)                                                              | 100(2)                                                                                           | 100(2)                                                                                           |
| Crystal size (mm <sup>3</sup> )                                                                       | 0.426 x 0.389 x<br>0.356                                            | 0.483 x 0.201 x<br>0.146                                                                         | 0.425 x 0.348 x<br>0.268                                                                         |
| Space group                                                                                           | <i>P</i> 2 <sub>1</sub> / <i>n</i>                                  | <i>P</i> $\bar{1}$ .                                                                             | <i>C</i> 2/ <i>c</i>                                                                             |
| a (Å)                                                                                                 | 13.5226(8)                                                          | 13.5666(5)                                                                                       | 13.4625(5)                                                                                       |
| b (Å)                                                                                                 | 21.9475(13)                                                         | 13.5671(5)                                                                                       | 23.7520(9)                                                                                       |
| c (Å)                                                                                                 | 19.2826(12)                                                         | 31.5352(12)                                                                                      | 31.8025(12)                                                                                      |
| α (°)                                                                                                 | 90                                                                  | 91.934(2)                                                                                        | 90                                                                                               |
| β (°)                                                                                                 | 105.4661(11)                                                        | 100.4481(19)                                                                                     | 99.8591(8)                                                                                       |
| γ (°)                                                                                                 | 90                                                                  | 116.7479(17)°                                                                                    | 90                                                                                               |
| V (Å <sup>3</sup> )                                                                                   | 5515.6(6)                                                           | 5053.1(3)                                                                                        | 10019.0(7)                                                                                       |
| Z                                                                                                     | 4                                                                   | 2                                                                                                | 4                                                                                                |
| ρ <sub>calc.</sub> (g·cm <sup>-3</sup> )                                                              | 1.096                                                               | 1.132                                                                                            | 1.163                                                                                            |
| μ (mm <sup>-1</sup> )                                                                                 | 0.270                                                               | 2.538                                                                                            | 0.303                                                                                            |
| F(000)                                                                                                | 1992                                                                | 1872                                                                                             | 3808                                                                                             |
| θ range for data collection (°)                                                                       | 1.652 to 26.099                                                     | 1.437 a 26.022                                                                                   | 1.715 a 26.099                                                                                   |
| No. of reflections                                                                                    | 82469                                                               | 86288                                                                                            | 74582                                                                                            |
| No. of independent reflections<br>( <i>R</i> <sub>int</sub> )                                         | 10935 (0.0313)                                                      | 19114 (0.0414)                                                                                   | 9927 (0.0220)                                                                                    |
| No. of data/restr./param.                                                                             | 10935 / 487 / 714                                                   | 19114 / 4327 / 1861                                                                              | 9927 / 927 / 815                                                                                 |
| Goodnes-on-fit (GOF) on <i>F</i> <sup>2</sup>                                                         | 1.030                                                               | 1.023                                                                                            | 1.064                                                                                            |
| <i>R</i> <sub>1</sub> , <sup>a</sup> <i>wR</i> <sub>2</sub> <sup>b</sup> ( <i>I</i> > 2σ( <i>I</i> )) | 0.0320, 0.0834                                                      | 0.0524, 0.1314                                                                                   | 0.0293, 0.0748                                                                                   |
| <i>R</i> <sub>1</sub> , <sup>a</sup> <i>wR</i> <sub>2</sub> <sup>b</sup> ( <i>all data</i> )          | 0.0389, 0.0884                                                      | 0.0580, 0.1353                                                                                   | 0.0322, 0.0767                                                                                   |
| Largest diff. peak/hole (e·Å <sup>-3</sup> )                                                          | 0.490 / -0.379                                                      | 0.849 / -0.685                                                                                   | 0.571 / -0.279                                                                                   |
| CCDC                                                                                                  | 2156311                                                             | 2156307                                                                                          | 2156306                                                                                          |

$$^a R_1 = \sum ||F_o| - |F_c|| / \sum |F_o|. \quad ^b wR_2 = [\sum w(F_o^2 - F_c^2)^2 / \sum (F_o^2)^2]^{1/2}$$

**Table S4.** Selected crystallographic data for compounds **4–6**.

|                                                                                                       | <b>4</b>                                                                                        | <b>5</b>                                                                                         | <b>6</b>                                                                                         |
|-------------------------------------------------------------------------------------------------------|-------------------------------------------------------------------------------------------------|--------------------------------------------------------------------------------------------------|--------------------------------------------------------------------------------------------------|
| Empirical formula                                                                                     | C <sub>72</sub> H <sub>162</sub> O <sub>26</sub> Si <sub>6</sub> Ti <sub>2</sub> K <sub>2</sub> | C <sub>72</sub> H <sub>162</sub> O <sub>26</sub> Si <sub>6</sub> Rb <sub>2</sub> Ti <sub>2</sub> | C <sub>72</sub> H <sub>162</sub> O <sub>26</sub> Si <sub>6</sub> Cs <sub>2</sub> Ti <sub>2</sub> |
| Formula mass (g/mol)                                                                                  | 1786.55                                                                                         | 1879.29                                                                                          | 1974.17                                                                                          |
| T (K)                                                                                                 | 100(2)                                                                                          | 100(2)                                                                                           | 100(2)                                                                                           |
| Crystal size (mm <sup>3</sup> )                                                                       | 0.280 x 0.199 x<br>0.125                                                                        | 0.439 x 0.241 x<br>0.182                                                                         | 0.611 x 0.526 x<br>0.270                                                                         |
| Space group                                                                                           | <i>P</i> 2 <sub>1</sub> / <i>n</i>                                                              | <i>P</i> 2 <sub>1</sub> / <i>n</i>                                                               | <i>P</i> 2 <sub>1</sub> / <i>c</i>                                                               |
| a (Å)                                                                                                 | 13.9466(4)                                                                                      | 13.8809(5)                                                                                       | 35.3441(14)                                                                                      |
| b (Å)                                                                                                 | 22.9279(6)                                                                                      | 23.1419(8)                                                                                       | 17.2885(8)                                                                                       |
| c (Å)                                                                                                 | 16.8771(4)                                                                                      | 16.9695(6)                                                                                       | 26.0710(14)                                                                                      |
| α(°)                                                                                                  | 90                                                                                              | 90                                                                                               | 90                                                                                               |
| β(°)                                                                                                  | 108.6892(5) <sup>o</sup>                                                                        | 107.9833(8)                                                                                      | 101.1948(6) <sup>o</sup>                                                                         |
| γ(°)                                                                                                  | 90                                                                                              | 90                                                                                               | 90                                                                                               |
| V (Å <sup>3</sup> )                                                                                   | 5112.2(2)                                                                                       | 5184.8(3)                                                                                        | 15627.5(13)                                                                                      |
| Z                                                                                                     | 2                                                                                               | 2                                                                                                | 6                                                                                                |
| ρ <sub>calc.</sub> (g·cm <sup>-3</sup> )                                                              | 1.161                                                                                           | 1.204                                                                                            | 1.259                                                                                            |
| μ (mm <sup>-1</sup> )                                                                                 | 0.370                                                                                           | 1.217                                                                                            | 0.972                                                                                            |
| F(000)                                                                                                | 1936                                                                                            | 2008                                                                                             | 6240                                                                                             |
| θ range for data collection (°)                                                                       | 1.655 to 27.101                                                                                 | 1.882 to 30.507                                                                                  | 1.592 a 26.087                                                                                   |
| No. of reflections                                                                                    | 58214                                                                                           | 89116                                                                                            | 231333                                                                                           |
| No. of independent reflections<br>( <i>R</i> <sub>int</sub> )                                         | 11278 (0.0328)                                                                                  | 15821 (0.0304)                                                                                   | 30915 (0.0261)                                                                                   |
| No. of data/restr./param.                                                                             | 11278 / 432 / 641                                                                               | 15821 / 1540 / 735                                                                               | 30915 / 2695 / 2226                                                                              |
| Goodnes-on-fit (GOF) on <i>F</i> <sup>2</sup>                                                         | 1.037                                                                                           | 1.039                                                                                            | 1.141                                                                                            |
| <i>R</i> <sub>1</sub> , <sup>a</sup> <i>wR</i> <sub>2</sub> <sup>b</sup> ( <i>I</i> > 2σ( <i>I</i> )) | 0.0376, 0.0971                                                                                  | 0.0321, 0.0830                                                                                   | 0.0321, 0.0706                                                                                   |
| <i>R</i> <sub>1</sub> , <sup>a</sup> <i>wR</i> <sub>2</sub> <sup>b</sup> ( <i>all data</i> )          | 0.0447, 0.1018                                                                                  | 0.0433, 0.0886                                                                                   | 0.0365, 0.0728                                                                                   |
| Largest diff. peak/hole (e·Å <sup>-3</sup> )                                                          | 0.630 / -0.478                                                                                  | 1.736 / -0.477                                                                                   | 1.358 / -0.775                                                                                   |
| CCDC                                                                                                  | 2156305                                                                                         | 2156308                                                                                          | 2156310                                                                                          |

$$^a R_1 = \sum ||F_o| - |F_c|| / \sum |F_o|. \quad ^b wR_2 = [\sum w(F_o^2 - F_c^2)^2 / \sum (F_o^2)^2]^{1/2}$$

**Table S5.** Selected crystallographic data for compound **7**.

| <b>7</b>                                                                                              |                                                                    |
|-------------------------------------------------------------------------------------------------------|--------------------------------------------------------------------|
| Empirical formula                                                                                     | C <sub>40</sub> H <sub>90</sub> O <sub>13</sub> Si <sub>3</sub> Ti |
| Formula mass (g/mol)                                                                                  | 911.28                                                             |
| T (K)                                                                                                 | 100(2)                                                             |
| Crystal size (mm <sup>3</sup> )                                                                       | 0.423 x 0.339 x 0.232                                              |
| Space group                                                                                           | <i>Pbca</i>                                                        |
| a (Å)                                                                                                 | 22.2645(10)                                                        |
| b (Å)                                                                                                 | 21.7564(10)                                                        |
| c (Å)                                                                                                 | 22.6575(10)                                                        |
| α(°)                                                                                                  | 90                                                                 |
| β(°)                                                                                                  | 90                                                                 |
| γ(°)                                                                                                  | 90                                                                 |
| V (Å <sup>3</sup> )                                                                                   | 10975.2(9)                                                         |
| Z                                                                                                     | 8                                                                  |
| ρ <sub>calc.</sub> (g·cm <sup>-3</sup> )                                                              | 1.103                                                              |
| μ (mm <sup>-1</sup> )                                                                                 | 0.272                                                              |
| F(000)                                                                                                | 3984                                                               |
| θ range for data collection (°)                                                                       | 1.798 to 26.401                                                    |
| No. of reflections                                                                                    | 86645                                                              |
| No. of independent reflections<br>( <i>R</i> <sub>int</sub> )                                         | 11236 [ <i>R</i> <sub>(int)</sub> = 0.0271]                        |
| No. of data/restr./param.                                                                             | 11236 / 1367 / 810                                                 |
| Goodnes-on-fit (GOF) on <i>F</i> <sup>2</sup>                                                         | 1.032                                                              |
| <i>R</i> <sub>1</sub> , <sup>a</sup> <i>wR</i> <sub>2</sub> <sup>b</sup> ( <i>I</i> > 2σ( <i>I</i> )) | 0.0280, 0.0726                                                     |
| <i>R</i> <sub>1</sub> , <sup>a</sup> <i>wR</i> <sub>2</sub> <sup>b</sup> ( <i>all data</i> )          | 0.0351, 0.0779                                                     |
| Largest diff. peak/hole (e·Å <sup>-3</sup> )                                                          | 0.360 / -0.341                                                     |
| CCDC                                                                                                  | 2156309                                                            |

<sup>a</sup>  $R_1 = \sum ||F_o| - |F_c|| / \sum |F_o|$ . <sup>b</sup>  $wR_2 = [\sum w(F_o^2 - F_c^2)^2 / \sum (F_o^2)^2]^{1/2}$

**Table S6.** Selected bond distances (Å) and angles (°) for compound **1**.

| <b>1</b>        |                       |
|-----------------|-----------------------|
| Ti(1)–O(1)      | 1.8366(10)            |
| Ti(1)–O(5)      | 1.7975(10)            |
| Ti(1)–O(9)      | 1.8131(9)             |
| Ti(1)–N(1)      | 1.8560(12)            |
| Si–O (range)    | 1.6155(10)–1.6272(11) |
| O(1)–Ti(1)–O(5) | 111.01(5)             |
| O(1)–Ti(1)–O(9) | 107.86(5)             |
| O(5)–Ti(1)–O(9) | 113.32(5)             |
| O(1)–Ti(1)–N(1) | 110.76(5)             |
| O(5)–Ti(1)–N(1) | 105.03(5)             |
| O(9)–Ti(1)–N(1) | 108.86(5)             |
| O–Si–O (range)  | 104.72(5)–114.18(6)   |

**Table S7.** Selected bond distances (Å) and angles (°) for compounds **2** and **3**.

|                  | <b>2</b>              | <b>3</b>              |
|------------------|-----------------------|-----------------------|
| Si–O(Ti) (range) | 1.582(4)–1.606(3)     | 1.6005(10)–1.6031(10) |
| Si–O(C) (range)  | 1.607(4)–1.659(3)     | 1.616(6)–1.6559(9)    |
| Ti–OM            | 1.705(2)              | 1.6828(9)             |
| Ti–OSi (range)   | 1.817(2)–1.862(2)     | 1.8382(9)–1.8643(9)   |
| M–O(Ti) (range)  | 1.676(7)–1.933(5)     | 2.2802(10)–2.4175(11) |
| M–O(Si) (range)  | 1.899(6)–1.965(6)     | 2.4293(11)–2.5655(11) |
| O–Si–O (range)   | 104.26(12)–115.03(14) | 104.1(2)–115.5(2)     |
| O–Ti–O (range)   | 102.93(13)–114.45(18) | 105.67(4)–113.80(5)   |
| Si–O–Ti (range)  | 146.62(17)–163.48(14) | 147.86(6)–175.37(7)   |
| Ti–O–M (range)   | 89.6(3)–157.3(2)      | 98.59(4)–162.26(6)    |
| M–O–M            | 82.6(2)               | 92.21(4)              |

**Table S8.** Selected bond distances (Å) and angles (°) for compounds **4–6**.

|                  | <b>4</b>              | <b>5</b>              | <b>6</b>              |
|------------------|-----------------------|-----------------------|-----------------------|
| Si–O(Ti) (range) | 1.5977(12)–1.5995(12) | 1.5962(10)–1.5998(11) | 1.5957(17)–1.617(3)   |
| Si–O(C) (range)  | 1.6205(12)–1.6450(12) | 1.6198(10)–1.6379(11) | 1.6187(17)–1.642(2)   |
| Ti–OM            | 1.6737(11)            | 1.6723(10)            | 1.6703(17)            |
| Ti–OSi (range)   | 1.8419(11)–1.8637(12) | 1.8450(10)–1.8646(10) | 1.8404(18)–1.8695(15) |
| M–O(Ti) (range)  | 2.6478(12)–2.6547(13) | 2.7748(11)–2.7979(11) | 2.8940(15)–3.1233(16) |
| M–O(Si) (range)  | 2.8699(13)–3.0428(12) | 2.9947(11)–3.1181(10) | 3.1903(17)–3.6804(17) |
| M···H            | 2.802–3.112           | 2.927–3.099           | 3.283–3.513           |
| O–Si–O (range)   | 103.20(6)–113.72(7)   | 103.64(5)–113.92(6)   | 103.20(11)–115.27(13) |
| O–Ti–O (range)   | 108.29(6)–111.30(5)   | 108.23(5)–110.81(5)   | 105.44(7)–113.46(7)   |
| Si–O–Ti (range)  | 150.24(8)–174.21(8)   | 155.21(8)–178.05(7)   | 143.16(10)–169.74(11) |
| Ti–O–M (range)   | 118.66(6)–123.35(6)   | 82.87(4)–121.14(5)    | 83.33(6)–122.67(9)    |
| M–O–M            | 99.92(4)              | 99.31(3)              | 109.22(5)             |
| C–H···M          | 100.80–117.03         | 113.14–117.55         | 117.95–126.80         |

**Table S9.** Selected bond distances (Å) and angles (°) for compound **7**.

| <b>7</b>         |                     |
|------------------|---------------------|
| Ti(1)–O(1)       | 1.8147(9)           |
| Ti(1)–O(5)       | 1.8116(9)           |
| Ti(1)–O(9)       | 1.7975(9)           |
| Ti(1)–O(13)      | 1.747(5)            |
| Si–O (range)     | 1.6133(9)–1.6257(9) |
| O(13)–Ti(1)–O(9) | 113.9(5)            |
| O(13)–Ti(1)–O(5) | 108.5(7)            |
| O(5)–Ti(1)–O(9)  | 109.26(4)           |
| O(1)–Ti(1)–O(13) | 108.1(4)            |
| O(5)–Ti(1)–O(1)  | 110.04(4)           |
| O(9)–Ti(1)–O(1)  | 107.19(4)           |
| O–Si–O (range)   | 105.25(5)–113.86(5) |



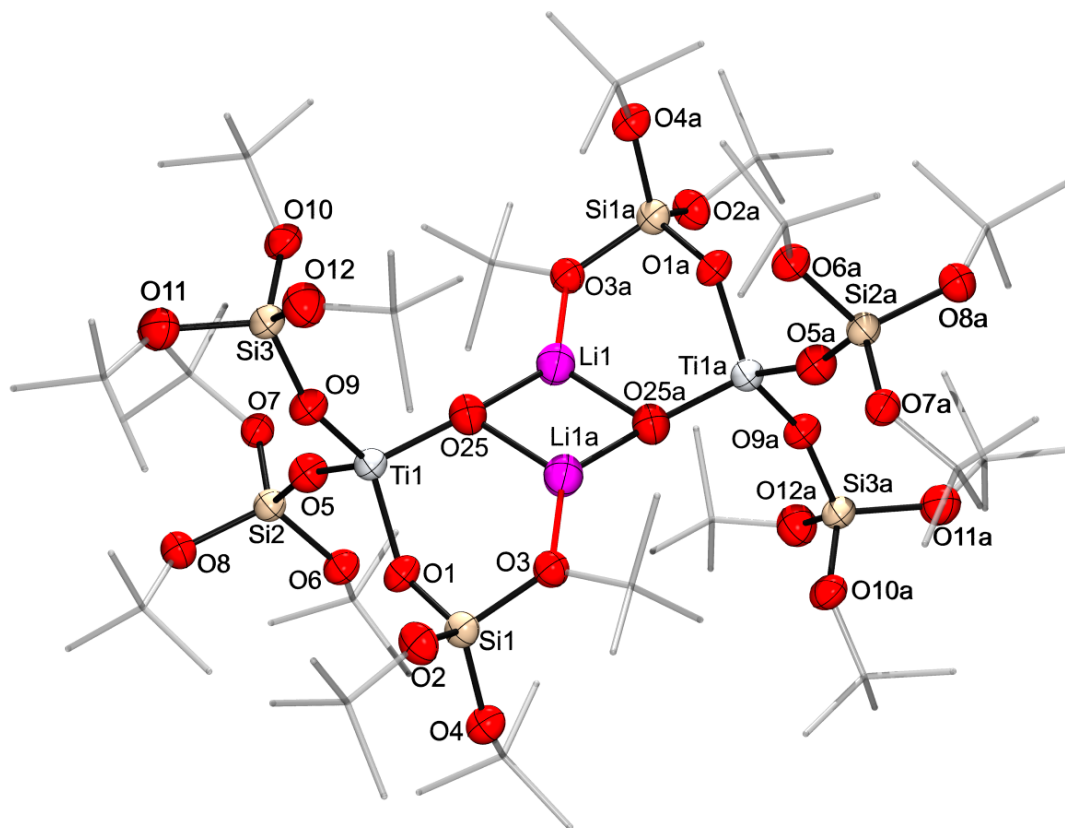

**Figure S34.** Molecular structure of compound **2** with thermal ellipsoids set at 50% probability level. Carbon-bound hydrogen atoms and thermal ellipsoids of the carbon atoms were eliminated for the sake of clarity.

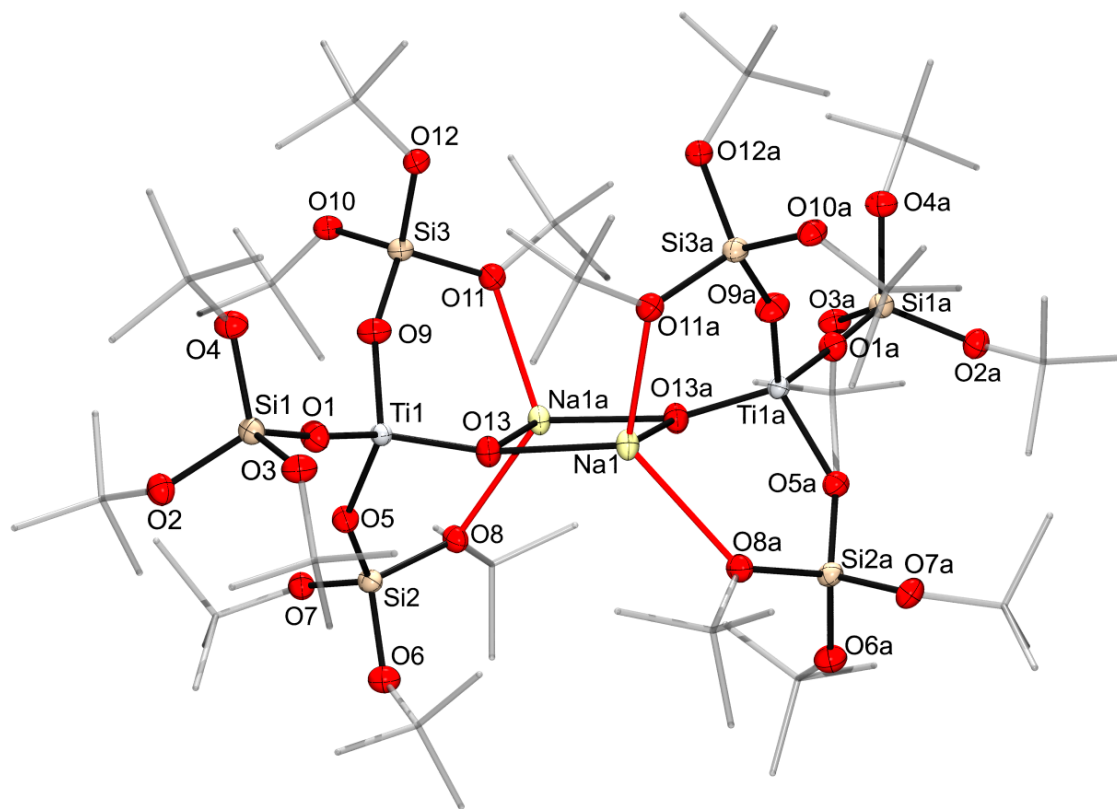

**Figure S35.** Molecular structure of compound **3** with thermal ellipsoids set at 50% probability level. Carbon-bound hydrogen atoms and thermal ellipsoids of the carbon atoms were eliminated for the sake of clarity.

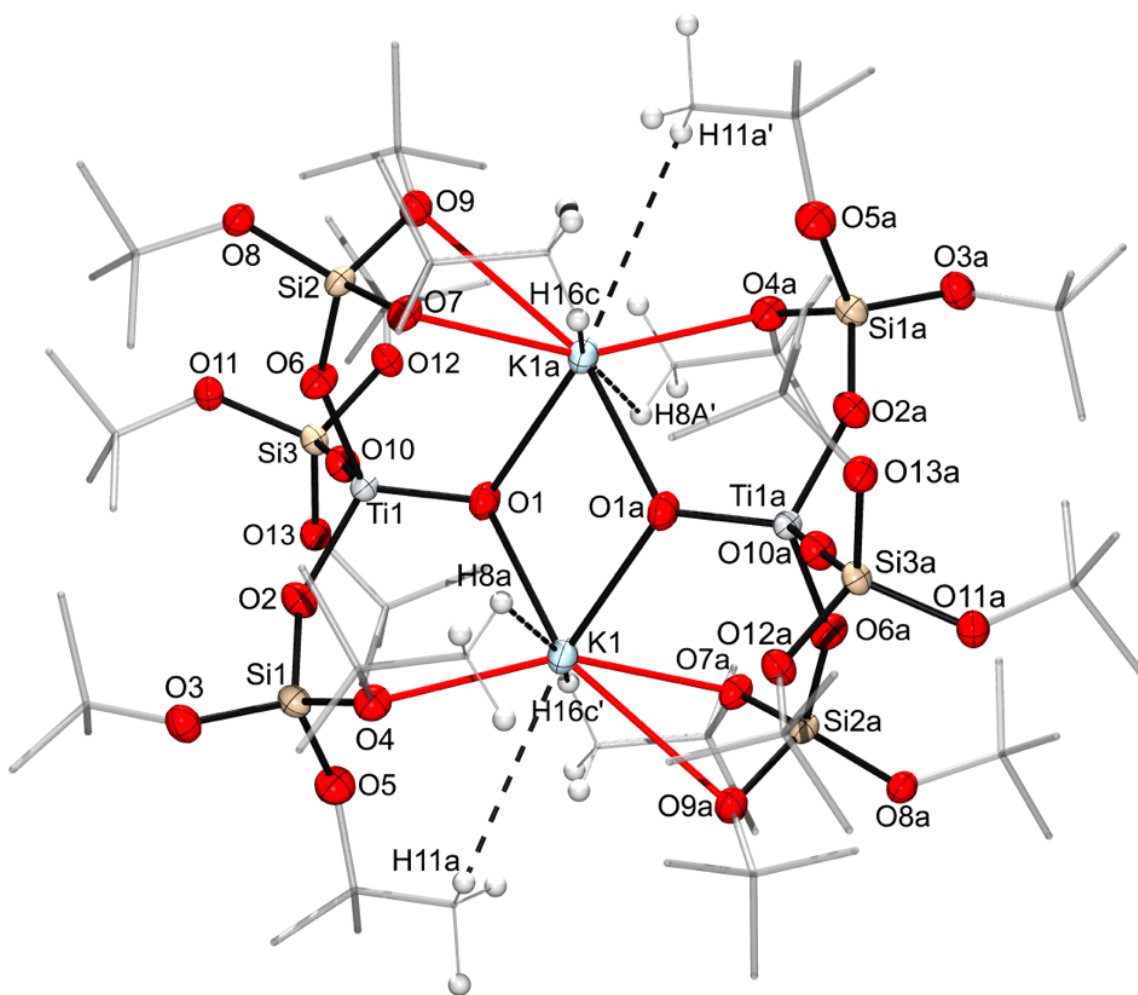

**Figure S36.** Molecular structure of compound **4** with thermal ellipsoids set at 50% probability level. Carbon-bound hydrogen atoms and thermal ellipsoids of the carbon atoms were eliminated for the sake of clarity.

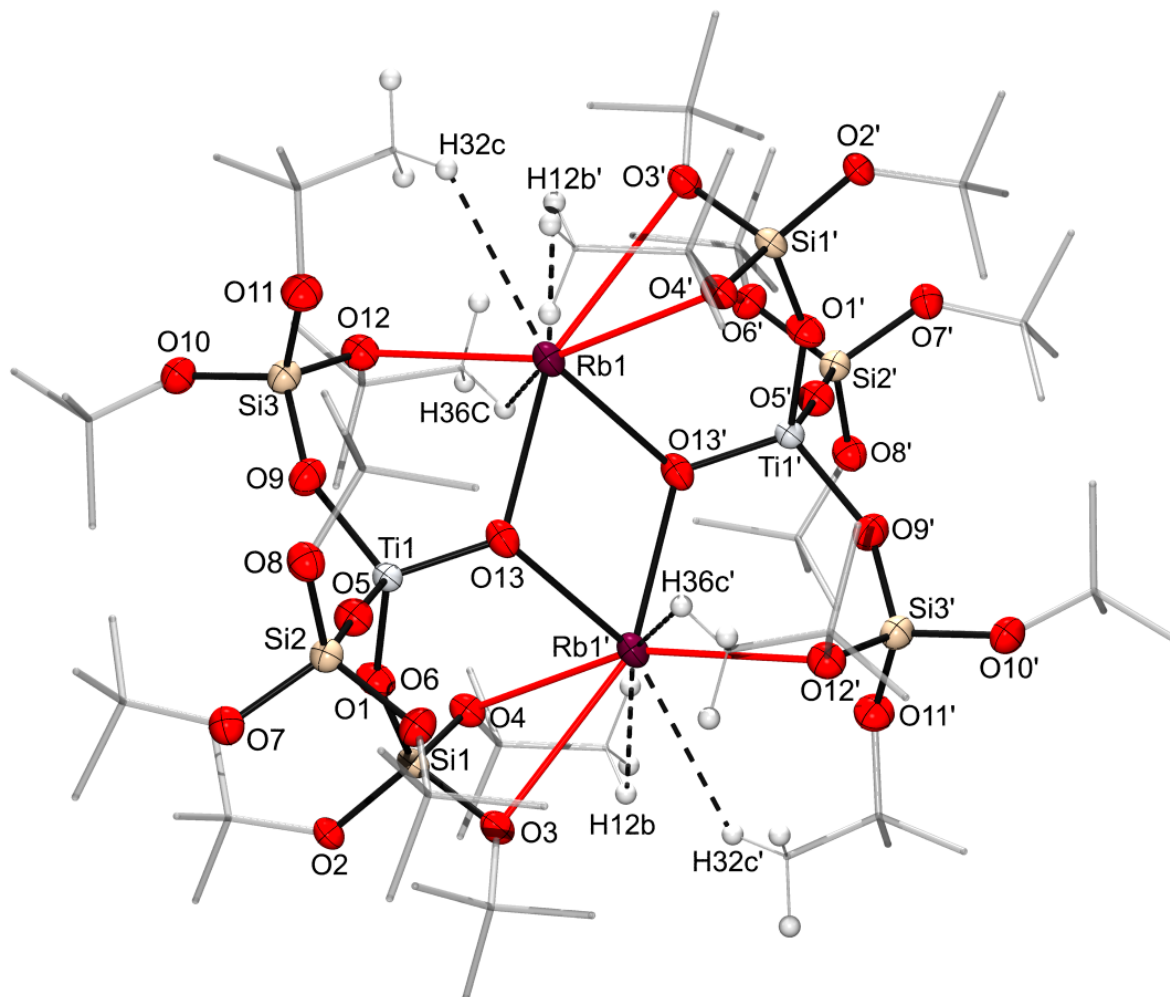

**Figure S37.** Molecular structure of compound **5** with thermal ellipsoids set at 50% probability level. Carbon-bound hydrogen atoms and thermal ellipsoids of the carbon atoms were eliminated for the sake of clarity.

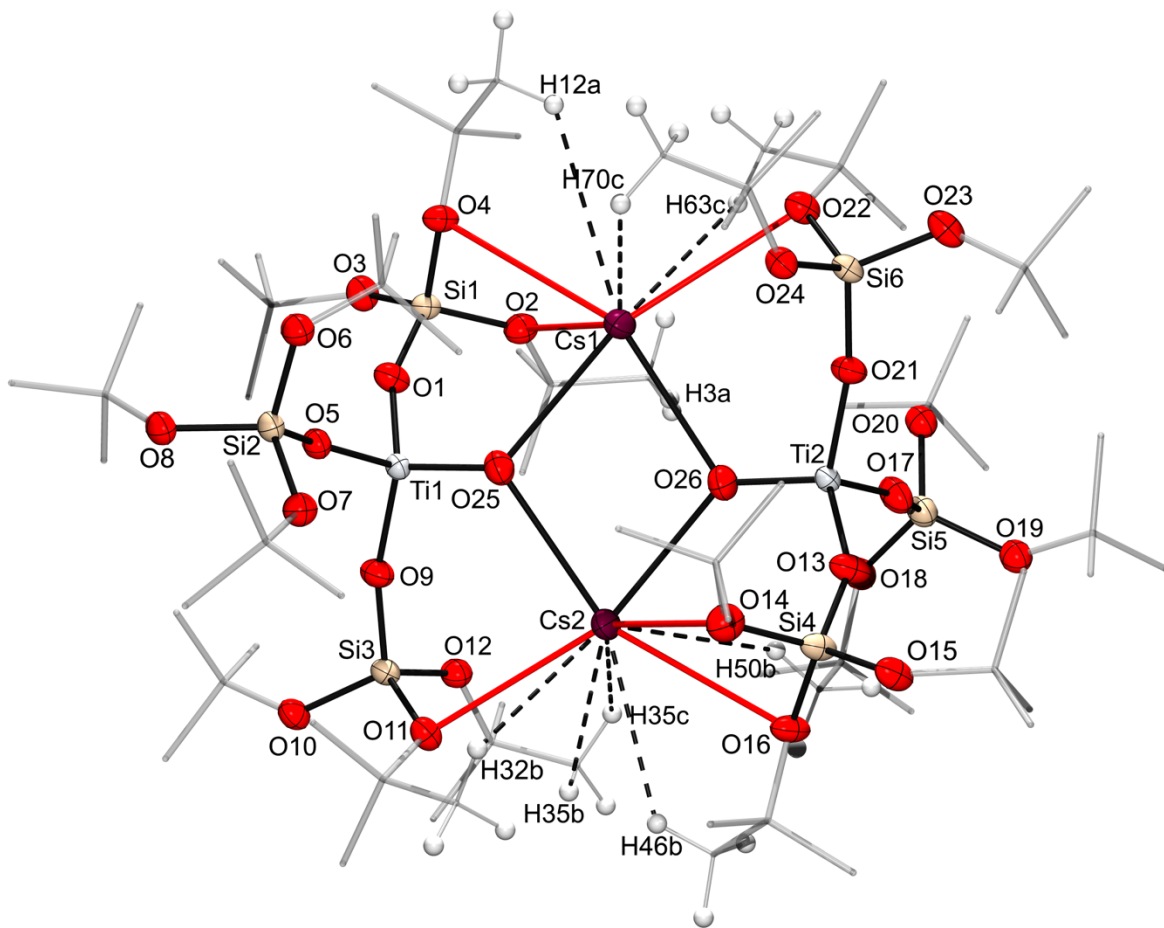

**Figure S38.** Molecular structure of compound **6** with thermal ellipsoids set at 50% probability level. Carbon-bound hydrogen atoms and thermal ellipsoids of the carbon atoms were eliminated for the sake of clarity.

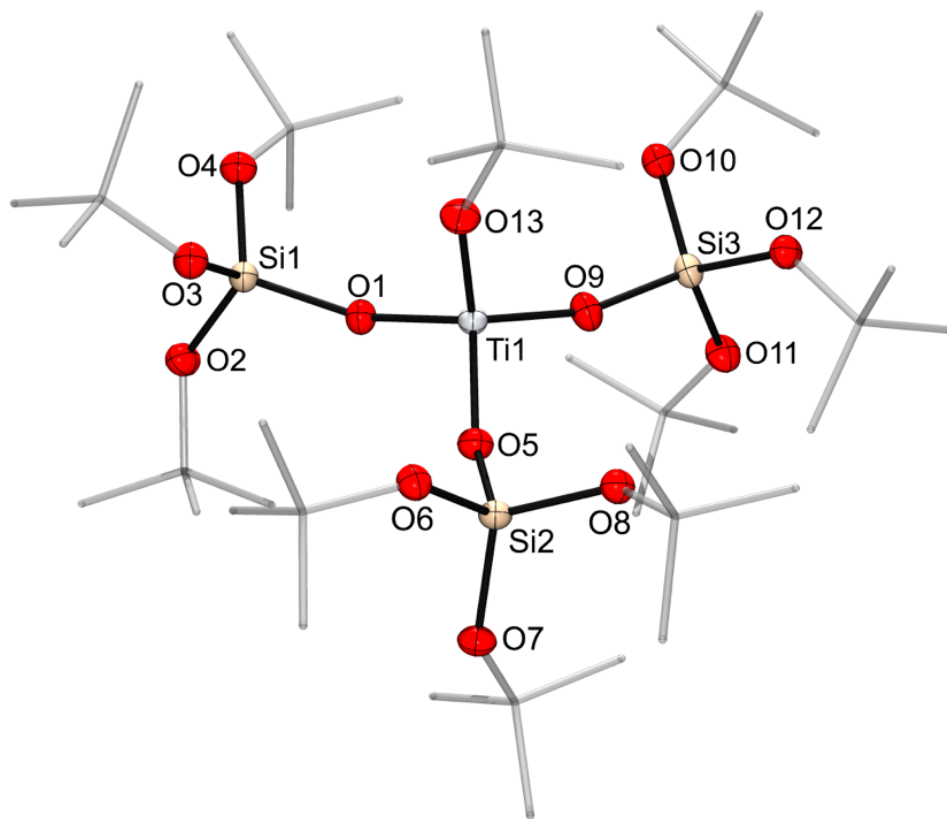

**Figure S39.** Molecular structure of compound **7** with thermal ellipsoids set at 50% probability level. Carbon-bound hydrogen atoms and thermal ellipsoids of the carbon atoms were eliminated for the sake of clarity.

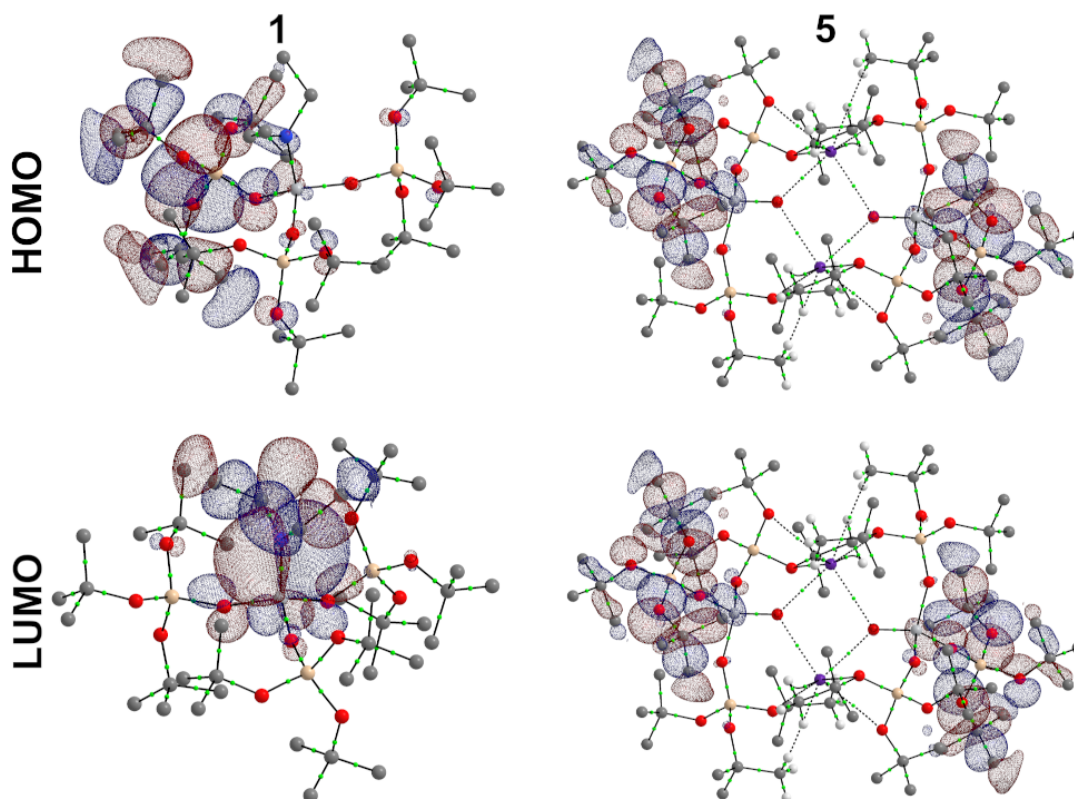

**Figure S40.** HOMO and LUMO orbitals for compounds **1** and **5** obtained from HAR.

### 5. Hirshfeld atom refinement obtained coordinates of **1** and **5**.

#### Compound **1**

| Atom | x            | y             | z             |
|------|--------------|---------------|---------------|
| Ti1  | 3.8174114837 | 16.1753750937 | 12.0786544704 |
| Si2  | 2.1709977768 | 19.0393887352 | 12.8426426299 |
| O3   | 3.2741780911 | 14.8071224499 | 13.1769936913 |
| O4   | 3.3995515904 | 12.3280582003 | 12.1404935734 |
| O5   | 5.6121943308 | 16.2398689996 | 11.9648499076 |
| O6   | 7.8912486784 | 17.5351631188 | 11.4966083343 |
| O7   | 3.0839369174 | 17.7136433917 | 12.7033972570 |
| O8   | 2.0434637579 | 19.4720262472 | 14.4050617890 |
| O9   | 2.9032708938 | 20.1560167081 | 11.9256048792 |
| O10  | 0.6723092595 | 18.8307402685 | 12.2646738521 |
| C11  | 4.5681671005 | 11.5430507182 | 12.4025087824 |
| C12  | 5.5500190892 | 12.2923791333 | 13.2898782530 |
| H13  | 6.4644049686 | 11.6933129688 | 13.4124277503 |
| H14  | 5.8029070437 | 13.2564251490 | 12.8244073883 |

|      |               |               |               |
|------|---------------|---------------|---------------|
| H15  | 5.0929041343  | 12.4693773394 | 14.2746207295 |
| C16  | 4.1319506252  | 10.2264119754 | 13.0433005413 |
| H17  | 5.0009042459  | 9.5584142934  | 13.1365683913 |
| H18  | 3.7134651068  | 10.4251269702 | 14.0409890694 |
| H19  | 3.3674289386  | 9.7477820177  | 12.4136814922 |
| C20  | 5.2014585920  | 11.2863787653 | 11.0343351977 |
| H21  | 6.0963775910  | 10.6585285970 | 11.1565004383 |
| H22  | 4.4775584455  | 10.7708297990 | 10.3861237970 |
| H23  | 5.4859481018  | 12.2451611501 | 10.5762934524 |
| Si24 | 2.5900597915  | 13.3500801874 | 13.0588833031 |
| O25  | 2.4283934484  | 12.6689046637 | 14.5365386176 |
| C26  | 2.0287331937  | 13.1713280921 | 15.8074296169 |
| C27  | 1.6407082554  | 11.9707375813 | 16.6441816325 |
| H28  | 1.4668302054  | 12.2884539452 | 17.6828456303 |
| H29  | 0.7213003939  | 11.5230425053 | 16.2388934878 |
| H30  | 2.4520700503  | 11.2284129435 | 16.6187579096 |
| C31  | 3.2302190565  | 13.8466548525 | 16.4672986389 |
| H32  | 2.9445667539  | 14.2087508517 | 17.4659424325 |
| H33  | 4.0522912402  | 13.1218458706 | 16.5613700657 |
| H34  | 3.5586918212  | 14.6955035426 | 15.8495917983 |
| C35  | 0.8930746786  | 14.1675483279 | 15.6746378251 |
| H36  | 0.5714775616  | 14.4924648627 | 16.6751400627 |
| H37  | 1.2358295034  | 15.0396405677 | 15.0984655829 |
| H38  | 0.0481685020  | 13.6931466605 | 15.1539874737 |
| O39  | 1.1883311091  | 13.5970456749 | 12.2687270852 |
| C40  | 0.2476360080  | 12.6697129237 | 11.7210979812 |
| C41  | 0.0787515073  | 11.4489600029 | 12.6186403023 |
| H42  | -0.6435454808 | 10.7557952754 | 12.1627785661 |
| H43  | 1.0484908722  | 10.9431595505 | 12.7359930091 |
| H44  | -0.2905428529 | 11.7671389948 | 13.6047356257 |
| C45  | 0.7409736589  | 12.2102641014 | 10.3536295939 |
| H46  | 0.0254178120  | 11.4912015557 | 9.9282720210  |
| H47  | 0.8291909935  | 13.0790655783 | 9.6847485246  |
| H48  | 1.7242526110  | 11.7290353436 | 10.4612472069 |
| C49  | -1.0605497792 | 13.4196329325 | 11.5842028326 |
| H50  | -1.8183688115 | 12.7570179303 | 11.1407483662 |
| H51  | -1.3989419556 | 13.7508741779 | 12.5770624172 |
| H52  | -0.9147470112 | 14.2958301590 | 10.9353421632 |
| Si53 | 7.2015014516  | 16.0839827167 | 11.7026265784 |
| O54  | 7.3155381645  | 15.1198080845 | 10.4068803512 |
| C55  | 8.3892964830  | 14.4119558890 | 9.7649272494  |
| C56  | 7.8982995154  | 14.0674322999 | 8.3793432728  |
| H57  | 8.7022114313  | 13.5674121035 | 7.8192489806  |
| H58  | 7.0307745198  | 13.3952893291 | 8.4543391827  |
| H59  | 7.6041948127  | 14.9885914523 | 7.8549689529  |
| C60  | 8.6983980107  | 13.1677560610 | 10.5950331322 |
| H61  | 9.5197284202  | 12.6076024216 | 10.1242418400 |



|      |               |                |               |
|------|---------------|----------------|---------------|
| H62  | 8.9948474713  | 13.4688926032  | 11.6106288649 |
| H63  | 7.8032405221  | 12.5306704215  | 10.6480909779 |
| C64  | 9.6228478995  | 15.2986426257  | 9.7046577550  |
| H65  | 10.4410859929 | 14.7553559660  | 9.2093535756  |
| H66  | 9.3911577430  | 16.2109873256  | 9.1354943437  |
| H67  | 9.9287902760  | 15.57111138162 | 10.7255195950 |
| O68  | 7.9579646312  | 15.3619193603  | 12.9364931146 |
| C69  | 8.1234009336  | 15.8150305654  | 14.2984123587 |
| C70  | 8.3099227479  | 14.5546323678  | 15.1281449916 |
| H71  | 8.5548008693  | 14.8307169818  | 16.1643940837 |
| H72  | 7.3805638458  | 13.9663069351  | 15.1152850108 |
| H73  | 9.1293441134  | 13.9550290143  | 14.7050319611 |
| C74  | 9.3635269487  | 16.6847386342  | 14.3540766353 |
| H75  | 9.5545271849  | 16.9847908658  | 15.3949838048 |
| H76  | 10.2257275957 | 16.1188258476  | 13.9715155844 |
| H77  | 9.2103207105  | 17.5817710030  | 13.7361276484 |
| C78  | 6.9130668726  | 16.5950260880  | 14.7883419546 |
| H79  | 7.0604663324  | 16.8774095993  | 15.8412109695 |
| H80  | 6.7905244715  | 17.5025993448  | 14.1790026923 |
| H81  | 6.0128654517  | 15.9691819301  | 14.6991417579 |
| C82  | 7.5026696386  | 18.6996217987  | 10.7498455292 |
| C83  | 8.7937630483  | 19.4757438179  | 10.5193151388 |
| H84  | 8.5710564271  | 20.4036775874  | 9.9721946164  |
| H85  | 9.2513322013  | 19.7224785682  | 11.4887235245 |
| H86  | 9.4908210599  | 18.8612857922  | 9.9306287754  |
| C87  | 6.5379927114  | 19.5219848605  | 11.5798008822 |
| H88  | 6.3199518142  | 20.4665092841  | 11.0598663013 |
| H89  | 5.6043824998  | 18.9581209001  | 11.7227329325 |
| H90  | 6.9892920453  | 19.7383568861  | 12.5593478384 |
| C91  | 6.8696546157  | 18.3094245773  | 9.4210165164  |
| H92  | 6.6223222179  | 19.2177165362  | 8.8519536223  |
| H93  | 7.5773993724  | 17.6963925308  | 8.8437044105  |
| H94  | 5.9519646699  | 17.7322938628  | 9.6074715803  |
| C95  | 3.0224285449  | 19.4946178082  | 15.4524321178 |
| C96  | 3.1130951077  | 18.1041561615  | 16.0687458463 |
| H97  | 3.7925622621  | 18.1299395133  | 16.9334190740 |
| H98  | 2.1136781227  | 17.7827992856  | 16.3972205425 |
| H99  | 3.4985026188  | 17.3958714482  | 15.3205520084 |
| C100 | 4.3847108046  | 19.9204910538  | 14.9222644395 |
| H101 | 5.1051884444  | 19.9603191455  | 15.7525209526 |
| H102 | 4.7296911636  | 19.1938296551  | 14.1719631902 |
| H103 | 4.3034426203  | 20.9149993007  | 14.4592860207 |
| C104 | 2.5029630849  | 20.5028333545  | 16.4720787552 |
| H105 | 3.2200440470  | 20.5877347746  | 17.3018900821 |
| H106 | 2.3830017829  | 21.4839261538  | 15.9893092503 |
| H107 | 1.5311789897  | 20.1640145290  | 16.8604570145 |
| C108 | 3.7482407464  | 22.2266474681  | 11.1823603303 |

|      |               |               |               |
|------|---------------|---------------|---------------|
| H109 | 3.4889674163  | 23.2178628038 | 10.7820233690 |
| H110 | 4.3201170748  | 22.3457773480 | 12.1144363617 |
| H111 | 4.3568601848  | 21.6814886482 | 10.4458928009 |
| C112 | 1.6364342072  | 22.1519709220 | 12.5255091811 |
| H113 | 1.3782178769  | 23.1615934818 | 12.1733915757 |
| H114 | 0.7144921053  | 21.5808419771 | 12.7094512458 |
| H115 | 2.2143949680  | 22.2256996217 | 13.4585288044 |
| C116 | 2.4703590087  | 21.4426442164 | 11.4663512121 |
| C117 | 1.6601446659  | 21.2560466768 | 10.1872778626 |
| H118 | 1.3581858563  | 22.2394586377 | 9.7977628353  |
| H119 | 2.2743429343  | 20.7371665662 | 9.4365954364  |
| H120 | 0.7636979111  | 20.6569681189 | 10.4051959589 |
| C121 | -0.5183170925 | 18.2427233144 | 12.8226205737 |
| C122 | -1.2263634749 | 19.3020268441 | 13.6571739002 |
| H123 | -2.1459542730 | 18.8769496293 | 14.0857323022 |
| H124 | -0.5624170152 | 19.6332511083 | 14.4692488726 |
| H125 | -1.4820673351 | 20.1609044379 | 13.0192514938 |
| C126 | -1.3808840677 | 17.8409195425 | 11.6322309862 |
| H127 | -2.3568707510 | 17.4822200146 | 11.9910969933 |
| H128 | -1.5287766573 | 18.7113801807 | 10.9761622029 |
| H129 | -0.8796033288 | 17.0391375280 | 11.0702137009 |
| C130 | -0.1680699540 | 17.0312350278 | 13.6771484733 |
| H131 | -1.0911489827 | 16.5820391258 | 14.0723045407 |
| H132 | 0.3659876798  | 16.2913161727 | 13.0628987530 |
| H133 | 0.4738624147  | 17.3455427336 | 14.5132906281 |
| N134 | 3.2336242010  | 15.8949107126 | 10.3344593437 |
| C135 | 4.0583758102  | 15.4527642876 | 9.2053045970  |
| H136 | 4.0070709487  | 16.2110497949 | 8.4100869681  |
| H137 | 5.1054250924  | 15.3853332258 | 9.5356696043  |
| C138 | 3.6386541020  | 14.1111100662 | 8.6306483842  |
| H139 | 4.3466082964  | 13.8115954733 | 7.8438243531  |
| H140 | 3.6364993875  | 13.3546693765 | 9.4292678343  |
| H141 | 2.6288474625  | 14.1952964725 | 8.2026257423  |
| C142 | 1.8249795795  | 16.1492281919 | 10.0899242139 |
| H143 | 1.3776518160  | 15.2669778550 | 9.6087460772  |
| H144 | 1.3143706204  | 16.3040646453 | 11.0518516314 |
| C145 | 1.6014008847  | 17.3670327751 | 9.2049457302  |
| H146 | 0.5221687779  | 17.5187561052 | 9.0558206075  |
| H147 | 2.0332840439  | 18.2557831919 | 9.6882673734  |
| H148 | 2.0871529226  | 17.2067566706 | 8.2311096444  |

### Compound 5

| Atom | x            | y             | z             |
|------|--------------|---------------|---------------|
| Rb1  | 6.1031577592 | 10.6348738580 | 7.3937962685  |
| Rb2  | 2.5385832652 | 12.5070279218 | 8.7466862628  |
| Ti3  | 4.5834033825 | 10.0873235559 | 10.9553516022 |

|      |              |               |               |
|------|--------------|---------------|---------------|
| Ti4  | 4.0583376421 | 13.0545782239 | 5.1851309287  |
| Si5  | 3.1820233847 | 12.9145697531 | 12.1804142965 |
| Si6  | 5.4597176301 | 10.2273320262 | 3.9600682445  |
| Si7  | 3.0353070534 | 7.2714173493  | 12.1863861872 |
| Si8  | 5.6064339713 | 15.8704844305 | 3.9540963541  |
| Si9  | 7.9434572809 | 10.1109278177 | 10.5540991516 |
| Si10 | 0.6982837337 | 13.0309739621 | 5.5863833798  |
| O11  | 4.0147291987 | 11.5781236804 | 11.9195850064 |
| O12  | 4.6270118158 | 11.5637780995 | 4.2208975346  |
| O13  | 3.2163011773 | 13.3790279689 | 13.7323227360 |
| O14  | 5.4254398473 | 9.7628738110  | 2.4081597952  |
| O15  | 3.7778780805 | 8.5664388989  | 11.6255052143 |
| O16  | 4.8638629440 | 14.5754628809 | 4.5149773272  |
| O17  | 3.0081892413 | 7.2077768042  | 13.8162534524 |
| O18  | 5.6335517833 | 15.9341249756 | 2.3242290887  |
| O19  | 6.4407714353 | 9.9637459561  | 11.0794731820 |
| O20  | 2.2009695792 | 13.1781558232 | 5.0610093492  |
| O21  | 8.1182885241 | 11.3483265327 | 9.4933473499  |
| O22  | 0.5234525003 | 11.7935752471 | 6.6471351814  |
| O23  | 4.1632780402 | 10.3106431930 | 9.3498589492  |
| O24  | 4.4784629844 | 12.8312585868 | 6.7906235922  |
| C25  | 4.2015685531 | 13.1948180548 | 14.7667661853 |
| C26  | 4.4401724715 | 9.9470837250  | 1.3737163556  |
| C27  | 4.1203828769 | 11.7655738849 | 15.2884264255 |
| C28  | 4.5213581477 | 11.3763278950 | 0.8520561155  |
| H29  | 4.3408602738 | 11.0636898308 | 14.4706558728 |
| H30  | 4.3008807507 | 12.0782119491 | 1.6698266684  |
| H31  | 4.8532890432 | 11.6282255843 | 16.0971193080 |
| H32  | 3.7884519813 | 11.5136761955 | 0.0433632333  |
| H33  | 3.1083866290 | 11.5729514199 | 15.6741210851 |
| H34  | 5.5333543953 | 11.5689503594 | 0.4663614559  |
| C35  | 5.5973317004 | 13.4688186057 | 14.2350986346 |
| C36  | 3.0444093241 | 9.6730831741  | 1.9053838965  |
| H37  | 5.8333026785 | 12.7497953404 | 13.4367732535 |
| H38  | 2.8084383460 | 10.3921064390 | 2.7037092879  |
| H39  | 5.6421157037 | 14.4915020142 | 13.8324657737 |
| H40  | 2.9996253107 | 8.6503997652  | 2.3080167675  |
| H41  | 6.3276533466 | 13.3636416879 | 15.0509223277 |
| H42  | 2.3140876779 | 9.7782600919  | 1.0895602038  |
| C43  | 3.8351414649 | 14.1806631806 | 15.8627049296 |
| C44  | 4.8065995496 | 8.9612385992  | 0.2777776114  |
| H45  | 3.8994667499 | 15.2061403692 | 15.4699467396 |
| H46  | 4.7422742647 | 7.9357614101  | 0.6705358016  |
| H47  | 2.8087789960 | 13.9830286954 | 16.2055181062 |
| H48  | 5.8329620286 | 9.1588730845  | -0.0650355650 |
| H49  | 4.5318196785 | 14.0667493215 | 16.7063063050 |
| H50  | 4.1099213460 | 9.0751524578  | -0.5658237735 |

|     |               |               |               |
|-----|---------------|---------------|---------------|
| O51 | 1.6209578647  | 12.7676180417 | 11.7173445910 |
| O52 | 7.0207831501  | 10.3742837376 | 4.4231379501  |
| C53 | 0.4989901184  | 12.1342248730 | 12.3925009431 |
| C54 | 8.1427508961  | 11.0076769063 | 3.7479815982  |
| C55 | 0.9342005218  | 10.8530891847 | 13.0586187743 |
| C56 | 7.7075404926  | 12.2888125951 | 3.0818637670  |
| H57 | 1.3427272933  | 10.1669100620 | 12.3021372560 |
| H58 | 7.2990137312  | 12.9749917178 | 3.8383452752  |
| H59 | 1.7076559813  | 11.0742817415 | 13.8088458821 |
| H60 | 6.9340850430  | 12.0676200378 | 2.3316366593  |
| H61 | 0.0696539854  | 10.3836353987 | 13.5507291218 |
| H62 | 8.5720870395  | 12.7582663812 | 2.5897534091  |
| C63 | -0.0510721039 | 13.1142842584 | 13.4259761722 |
| C64 | 8.6928131185  | 10.0276175209 | 2.7145063687  |
| H65 | -0.2926965325 | 14.0682257017 | 12.9344341547 |
| H66 | 8.9344375470  | 9.0736760776  | 3.2060483766  |
| H67 | -0.9608556439 | 12.6953561764 | 13.8807215476 |
| H68 | 9.6025966587  | 10.4465456035 | 2.2597609938  |
| H69 | 0.7040406042  | 13.2853599217 | 14.2073455527 |
| H70 | 7.9377004203  | 9.8565418581  | 1.9331369887  |
| C71 | -0.5387390914 | 11.8789696837 | 11.3127028400 |
| C72 | 9.1804801160  | 11.2629320962 | 4.8277797013  |
| H73 | -0.7902367008 | 12.8268591162 | 10.8144511417 |
| H74 | 9.4319777251  | 10.3150426631 | 5.3260313996  |
| H75 | -0.1327174702 | 11.1726770190 | 10.5735835632 |
| H76 | 8.7744584850  | 11.9692247603 | 5.5668989681  |
| H77 | -1.4446415911 | 11.4525527709 | 11.7682349050 |
| H78 | 10.0863826158 | 11.6893490089 | 4.3722476362  |
| O79 | 3.7857750511  | 14.0323235792 | 11.1525888976 |
| O80 | 4.8559659734  | 9.1095782007  | 4.9878936436  |
| C81 | 3.6288949990  | 15.4629556493 | 11.0654306112 |
| C82 | 5.0128460255  | 7.6789461306  | 5.0750519203  |
| C83 | 3.0412179839  | 16.0850103271 | 12.2964652654 |
| C84 | 5.6005230308  | 7.0568914528  | 3.8440172756  |
| H85 | 2.9528735071  | 17.1718522605 | 12.1516548645 |
| H86 | 5.6888675172  | 5.9700495189  | 3.9888276667  |
| H87 | 2.0449234273  | 15.6578105839 | 12.4832745500 |
| H88 | 6.5968175975  | 7.4840911954  | 3.6572079913  |
| H89 | 3.6946794241  | 15.8817685813 | 13.1576743718 |
| H90 | 4.9470616004  | 7.2601331986  | 2.9828081594  |
| C91 | 5.0367303773  | 16.0505288042 | 10.8254216322 |
| C92 | 3.6050106472  | 7.0913729752  | 5.3150609086  |
| H93 | 5.4778720611  | 15.5909387090 | 9.9286657336  |
| H94 | 3.1638689633  | 7.5509630709  | 6.2118168077  |
| H95 | 4.9602154015  | 17.1382014479 | 10.6801155113 |
| H96 | 3.6815256131  | 6.0037003319  | 5.4603670301  |
| H97 | 5.6749036864  | 15.8409741484 | 11.6965254494 |

|      |               |               |               |
|------|---------------|---------------|---------------|
| H98  | 2.9668373382  | 7.3009276314  | 4.4439570917  |
| C99  | 2.7582249221  | 15.7557011014 | 9.8519891478  |
| C100 | 5.8835161024  | 7.3862006779  | 6.2884933936  |
| H101 | 2.6082890706  | 16.6982706744 | 9.7135037972  |
| H102 | 6.0334519538  | 6.4436311055  | 6.4269787441  |
| H103 | 1.8615145232  | 15.3650656615 | 9.9533513856  |
| H104 | 6.7802265012  | 7.7768361179  | 6.1871311558  |
| H105 | 3.2314458285  | 15.3703883120 | 9.0719195875  |
| H106 | 5.4102951860  | 7.7715134679  | 7.0685629438  |
| O107 | 1.4833633841  | 7.3656048565  | 11.7255763919 |
| O108 | 7.1583776307  | 15.7762969234 | 4.4149061395  |
| C109 | 0.3337255157  | 6.5898882669  | 12.0921265199 |
| C110 | 8.3080155090  | 16.5520135129 | 4.0483560113  |
| C111 | -0.3483626368 | 7.2096280742  | 13.2834555716 |
| C112 | 8.9901036613  | 15.9322737051 | 2.8570269697  |
| H113 | -0.5135526295 | 8.2807440165  | 13.0952453971 |
| H114 | 9.1552936438  | 14.8611577628 | 3.0452371442  |
| H115 | -1.3156109712 | 6.7134080065  | 13.4513737147 |
| H116 | 9.9573519857  | 16.4284937733 | 2.6891088168  |
| H117 | 0.2859309420  | 7.0873424749  | 14.1738027400 |
| H118 | 8.3558100827  | 16.0545593044 | 1.9666798013  |
| C119 | 0.6590697807  | 5.1275514043  | 12.2110821988 |
| C120 | 7.9826712338  | 18.0143503753 | 3.9294003422  |
| H121 | 0.8862455981  | 4.7202396930  | 11.2148450325 |
| H122 | 7.7554954165  | 18.4216620865 | 4.9256375088  |
| H123 | 1.5320062578  | 4.9983728844  | 12.8678127394 |
| H124 | 7.1097347669  | 18.1435288951 | 3.2726697917  |
| H125 | -0.2029023056 | 4.5936641232  | 12.6376600619 |
| H126 | 8.8446433302  | 18.5482376564 | 3.5028224694  |
| C127 | -0.6567409105 | 6.8638879077  | 10.9385664910 |
| C128 | 9.2984819349  | 16.2780138716 | 5.2019160501  |
| H129 | -0.7909880108 | 7.9492706210  | 10.8205737924 |
| H130 | 9.4327290356  | 15.1926311583 | 5.3199087390  |
| H131 | -0.2584978599 | 6.4400395853  | 10.0048881394 |
| H132 | 8.9002388846  | 16.7018621945 | 6.1355943920  |
| H133 | -1.6259565450 | 6.3974433722  | 11.1688939287 |
| H134 | 10.2676975694 | 16.7444584077 | 4.9715886023  |
| O135 | 3.7626477193  | 5.9111349346  | 11.6732809678 |
| O136 | 4.8790932952  | 17.2307668453 | 4.4672015735  |
| C137 | 4.2673036582  | 5.5850667995  | 10.3657407773 |
| C138 | 4.3744373664  | 17.5568349804 | 5.7747417641  |
| C139 | 4.2516116470  | 4.0627924824  | 10.2695434296 |
| C140 | 4.3901293776  | 19.0791092971 | 5.8709391017  |
| H141 | 4.7051100318  | 3.7508849284  | 9.3171500965  |
| H142 | 3.9366309827  | 19.3910168512 | 6.8233324449  |
| H143 | 4.8252809611  | 3.6366174697  | 11.1057722038 |
| H144 | 3.8164600535  | 19.5052843102 | 5.0347103272  |

|      |               |               |               |
|------|---------------|---------------|---------------|
| H145 | 3.2131280171  | 3.7031228548  | 10.3163375635 |
| H146 | 5.4286130073  | 19.4387789249 | 5.8241449778  |
| C147 | 5.6921679878  | 6.1302896716  | 10.2049815150 |
| C148 | 2.9495730368  | 17.0116121083 | 5.9355010164  |
| H149 | 6.0826245278  | 5.8498337599  | 9.2155936485  |
| H150 | 2.5591164968  | 17.2920680200 | 6.9248888923  |
| H151 | 5.6778083165  | 7.2264015156  | 10.2962657620 |
| H152 | 2.9639326979  | 15.9155002638 | 5.8442167693  |
| H153 | 6.3377701573  | 5.7055858188  | 10.9878127047 |
| H154 | 2.3039708672  | 17.4363159610 | 5.1526698362  |
| C155 | 3.3929123009  | 6.2279484491  | 9.2638299524  |
| C156 | 5.2488287137  | 16.9139533307 | 6.8766525789  |
| H157 | 3.7839043210  | 5.9467533975  | 8.2748634365  |
| H158 | 4.8578367036  | 17.1951483824 | 7.8656190949  |
| H159 | 2.3569672113  | 5.8717096113  | 9.3633881699  |
| H160 | 6.2847738035  | 17.2701921680 | 6.7770943609  |
| H161 | 3.4159774627  | 7.3226150831  | 9.3695330703  |
| H162 | 5.2257635618  | 15.8192866968 | 6.7709494706  |
| C163 | 4.0477261113  | 6.9768208865  | 14.7703169959 |
| C164 | 4.5940149133  | 16.1650808934 | 1.3701655454  |
| C165 | 3.5876896559  | 7.6703835400  | 16.0567133749 |
| C166 | 5.0540513587  | 15.4715182399 | 0.0837691564  |
| H167 | 3.4740621472  | 8.7486947725  | 15.8714194407 |
| H168 | 5.1676788774  | 14.3932070068 | 0.2690631007  |
| H169 | 2.6226634817  | 7.2493958673  | 16.3752946891 |
| H170 | 6.0190775327  | 15.8925059121 | -0.2348121581 |
| H171 | 4.3360619134  | 7.5110006576  | 16.8469894456 |
| H172 | 4.3056791111  | 15.6309011223 | -0.7065069043 |
| C173 | 4.1792945814  | 5.4793080116  | 14.9880522625 |
| C174 | 4.4624464432  | 17.6625937683 | 1.1524302686  |
| H175 | 4.4648136033  | 4.9950026941  | 14.0425749098 |
| H176 | 4.1769274212  | 18.1468990853 | 2.0979076313  |
| H177 | 4.9515378908  | 5.2855961665  | 15.7470754408 |
| H178 | 3.6902031338  | 17.8563056134 | 0.3934071003  |
| H179 | 3.2168109674  | 5.0728623501  | 15.3321850992 |
| H180 | 5.4249300570  | 18.0690394295 | 0.8082974322  |
| C181 | 5.3707832131  | 7.5639309319  | 14.2988535296 |
| C182 | 3.2709578115  | 15.5779708479 | 1.8416290016  |
| H183 | 5.6973419882  | 7.0452595817  | 13.3854316195 |
| H184 | 2.9443990364  | 16.0966421976 | 2.7550509119  |
| H185 | 5.2413186130  | 8.6353016440  | 14.0857716032 |
| H186 | 3.4004224115  | 14.5066001354 | 2.0547109280  |
| H187 | 6.1297059012  | 7.4354665516  | 15.0846865000 |
| H188 | 2.5120351232  | 15.7064352277 | 1.0557960412  |
| O189 | 8.9930670814  | 10.3650265669 | 11.7683486348 |
| O190 | -0.3513260670 | 12.7768752124 | 4.3721339062  |
| C191 | 8.9922399515  | 9.8508133773  | 13.1235035294 |

|      |               |               |               |
|------|---------------|---------------|---------------|
| C192 | -0.3504989370 | 13.2910884020 | 3.0169790120  |
| C193 | 7.9686019427  | 10.6684167205 | 13.9058327094 |
| C194 | 0.6731390718  | 12.4734850593 | 2.2346498219  |
| H195 | 8.2159906916  | 11.7373736625 | 13.8275381032 |
| H196 | 0.4257503327  | 11.4045281168 | 2.3129444379  |
| H197 | 6.9649800555  | 10.4929962469 | 13.4911389073 |
| H198 | 1.6767609590  | 12.6489055330 | 2.6493436337  |
| H199 | 7.9869052244  | 10.3642818769 | 14.9627940107 |
| H200 | 0.6548358004  | 12.7776199024 | 1.1776885306  |
| C201 | 8.6306555836  | 8.3602433730  | 13.0841208763 |
| C202 | 0.0110854409  | 14.7816584068 | 3.0563616650  |
| H203 | 7.6426083576  | 8.2348371234  | 12.6171774701 |
| H204 | 0.9991326568  | 14.9070646564 | 3.5233050709  |
| H205 | 9.3851327817  | 7.8152877709  | 12.4977867212 |
| H206 | -0.7433917572 | 15.3266140084 | 3.6426958101  |
| H207 | 8.6049924519  | 7.9619606921  | 14.1091635548 |
| H208 | 0.0367485728  | 15.1799410873 | 2.0313189862  |
| C209 | 10.4008188598 | 10.0692727844 | 13.6299919583 |
| C210 | -1.7590778353 | 13.0726289954 | 2.5104905830  |
| H211 | 11.1191274549 | 9.8190942549  | 12.8353576668 |
| H212 | -2.4773864305 | 13.3228075244 | 3.3051248642  |
| H213 | 10.5269574796 | 11.1228642453 | 13.9198786203 |
| H214 | -1.8852164550 | 12.0190375340 | 2.2206039108  |
| H215 | 10.5806375335 | 9.4247153748  | 14.5030390154 |
| H216 | -1.9388965191 | 13.7171864050 | 1.6374435259  |
| O217 | 8.2555083050  | 8.7719371147  | 9.6804156943  |
| O218 | 0.3862327197  | 14.3699646652 | 6.4600668370  |
| C219 | 9.4093801537  | 8.3826912645  | 8.8997007643  |
| C220 | -0.7676391290 | 14.7592105148 | 7.2407817766  |
| C221 | 9.3361754479  | 6.8634254978  | 8.7839733856  |
| C222 | -0.6944344234 | 16.2784762821 | 7.3565091457  |
| H223 | 8.4180044774  | 6.5803078658  | 8.2484300544  |
| H224 | 0.2237365472  | 16.5615939135 | 7.8920524769  |
| H225 | 10.2121868755 | 6.4952728295  | 8.2298364228  |
| H226 | -1.5704458508 | 16.6466289503 | 7.9106461181  |
| H227 | 9.3255462873  | 6.4191369236  | 9.7902014327  |
| H228 | -0.6838052626 | 16.7227648562 | 6.3502811082  |
| C229 | 10.7256931848 | 8.7997080668  | 9.5600077953  |
| C230 | -2.0839521602 | 14.3421937130 | 6.5804747360  |
| H231 | 11.5702091398 | 8.4201991273  | 8.9660667696  |
| H232 | -2.9284681152 | 14.7217026520 | 7.1744157718  |
| H233 | 10.7780951090 | 9.8972129112  | 9.6123274192  |
| H234 | -2.1363540943 | 13.2446888686 | 6.5281551222  |
| H235 | 10.7748030984 | 8.3814201146  | 10.5761886832 |
| H236 | -2.1330620840 | 14.7604816652 | 5.5642938481  |
| C237 | 9.3465934387  | 9.0181675136  | 7.5053244473  |
| C238 | -0.7048524142 | 14.1237342662 | 8.6351580941  |

|      |               |               |               |
|------|---------------|---------------|---------------|
| H239 | 10.0446986423 | 8.7677723141  | 6.9505759646  |
| H240 | -1.4029576179 | 14.3741294653 | 9.1899065668  |
| H241 | 9.4349491056  | 10.0505279927 | 7.5863496033  |
| H242 | -0.7932080810 | 13.0913737866 | 8.5541329280  |
| H243 | 8.5701875990  | 8.7147773404  | 7.1137562668  |
| H244 | 0.0715534255  | 14.4271244395 | 9.0267262640  |
| C245 | 8.3163613994  | 12.7685436717 | 9.7204441976  |
| C246 | 0.3253796250  | 10.3733581076 | 6.4200383438  |
| C247 | 7.4501242428  | 13.2505900988 | 10.8628675754 |
| C248 | 1.1916167816  | 9.8913116805  | 5.2776149659  |
| H249 | 7.5964569041  | 14.3317581419 | 11.0030909663 |
| H250 | 1.0452841104  | 8.8101436375  | 5.1373915651  |
| H251 | 6.3934891814  | 13.0505495034 | 10.6315533174 |
| H252 | 2.2482518429  | 10.0913522760 | 5.5089292235  |
| H253 | 7.7304649246  | 12.7200257683 | 11.7847736361 |
| H254 | 0.9112761001  | 10.4218760116 | 4.3557089050  |
| C255 | 9.7886850928  | 13.0043602899 | 10.0296957111 |
| C256 | -1.1469440682 | 10.1375414894 | 6.1107868298  |
| H257 | 10.4031120102 | 12.6229594708 | 9.2008331477  |
| H258 | -1.7613709855 | 10.5189423091 | 6.9396493937  |
| H259 | 9.9691533067  | 14.0823038830 | 10.1540702011 |
| H260 | -1.3274122921 | 9.0595978969  | 5.9864123403  |
| H261 | 10.0573137935 | 12.4781581797 | 10.9575697027 |
| H262 | -1.4155727689 | 10.6637436002 | 5.1829128286  |
| C263 | 7.9336706303  | 13.4607181753 | 8.4259774777  |
| C264 | 0.7080703845  | 9.6811836046  | 7.7145050631  |
| H265 | 8.4404637991  | 13.0726288552 | 7.6635010792  |
| H266 | 0.2012772155  | 10.0692729241 | 8.4769814521  |
| H267 | 8.1166492039  | 14.4525806412 | 8.5118448548  |
| H268 | 0.5250918204  | 8.6893211381  | 7.6286376766  |
| H269 | 6.9331019132  | 13.3290411753 | 8.2597305250  |
| H270 | 1.7086391114  | 9.8128606046  | 7.8807520158  |
